# Supplementary material
Source: PubMed Central journal article supplement (PMC6645010)

# Supporting Information

for

## Synthesis of Aryl Iodides from Arylhydrazines and Iodine

Chun-ping Dong,<sup>a</sup> Kentaro Nakamura,<sup>a</sup> Toshihide Taniguchi,<sup>b</sup> Soichiro Mita,<sup>a</sup>  
Shintaro Kodama,<sup>a</sup> Shin-ichi Kawaguchi,<sup>c</sup> Akihiro Nomoto,<sup>a</sup> Akiya Ogawa,<sup>\*a</sup> and  
Takumi Mizuno<sup>d</sup>

<sup>a</sup>Department of Applied Chemistry, Graduate School of Engineering, Osaka Prefecture University,  
1-1 Gakuen-cho, Nakaku, Sakai, Osaka 599-8531, Japan

<sup>b</sup>Seika Corporation, 1-1-82 Kozaika, Wakayama 641-0007, Japan

<sup>c</sup>Center for Education and Research in Agricultural Innovation, Faculty of Agriculture, Saga  
University, 152-1 Shonan-cho, Karatsu, Saga 847-0021, Japan

<sup>d</sup>Morinomiya Center, Osaka Research Institute of Industrial Science and Technology, 1-6-50  
Morinomiya, Joto-ku, Osaka 536-8553, Japan

[ogawa@chem.osakafu-u.ac.jp](mailto:ogawa@chem.osakafu-u.ac.jp)

### CONTENTS

|                                                                                                                       | page   |
|-----------------------------------------------------------------------------------------------------------------------|--------|
| Table S1. Optimization of the Iodination of Arylhydrazines with Iodine Using Several Bases                            | S2     |
| The Procedure of Using <i>tert</i> -Butylhydrazine Hydrochloride as Substrate.                                        | S2     |
| Copies of <sup>1</sup> H NMR and <sup>13</sup> C{ <sup>1</sup> H} NMR Spectra of Compounds <b>2a–v</b> , <b>2x–a'</b> | S3–S28 |

**Table S1. Optimization of the Iodination of Arylhydrazines with Iodine Using Several Bases<sup>a</sup>**

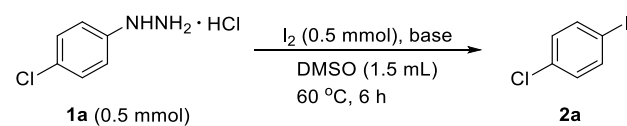

| entry | base (mmol)                           | yield <sup>b</sup> (%) |
|-------|---------------------------------------|------------------------|
| 1     | Li <sub>2</sub> CO <sub>3</sub> (0.5) | 21                     |
| 2     | Na <sub>2</sub> CO <sub>3</sub> (0.5) | 62                     |
| 3     | K <sub>2</sub> CO <sub>3</sub> (0.5)  | 59                     |
| 4     | Cs <sub>2</sub> CO <sub>3</sub> (0.5) | 63                     |
| 5     | K <sub>3</sub> PO <sub>4</sub> (0.5)  | 63                     |
| 6     | Et <sub>3</sub> N (0.5)               | 48                     |
| 7     | DBU (0.5)                             | 29                     |
| 8     | K <sub>2</sub> HPO <sub>4</sub> (0.5) | 45                     |
| 9     | KOAc (1.0)                            | 62                     |
| 10    | KOH (1.0)                             | 44                     |
| 11    | KOH (0.5)                             | 45                     |
| 12    | NaHCO <sub>3</sub> (1.0)              | 46                     |
| 13    | NaHCO <sub>3</sub> (0.5)              | 31                     |

<sup>a</sup>Conditions: **1a**, I<sub>2</sub>, base, and solvent were stirred at 60 °C for 6 h. <sup>b</sup>Determined by <sup>1</sup>H NMR spectroscopy of the crude mixture using 1,3,5-trioxane as an internal standard.

**The Procedure of Using *tert*-Butylhydrazine Hydrochloride as Substrate.** *tert*-Butylhydrazine hydrochloride (62.3 mg, 0.5 mmol), I<sub>2</sub> (126.9 mg, 0.5 mmol), and DMSO (0.1 mL) were added to a round-bottomed flask, and the reaction mixture was stirred at 60 °C for 6 h under air. The resulting mixture was cooled to room temperature and directly analyzed by <sup>1</sup>H NMR (CDCl<sub>3</sub>). As a result, the peak of 2-iodo-2-methylpropane (1.81 ppm) was not detected. Then, sat. Na<sub>2</sub>S<sub>2</sub>O<sub>8</sub> (aq., 5 mL) and water (10 mL) were added into the combined reaction mixture. The mixture was extracted with CHCl<sub>3</sub> (4×5 mL), dried over anhydrous Na<sub>2</sub>SO<sub>4</sub>, and concentrated *in vacuo*. The residue was analyzed by GC-MS, and unfortunately, GC-MS spectra also indicated no formation of 2-iodo-2-methylpropane (184 *m/z*).

**Figure S1:**  $^1\text{H}$  and  $^{13}\text{C}\{^1\text{H}\}$  NMR Spectra of Compound **2a**

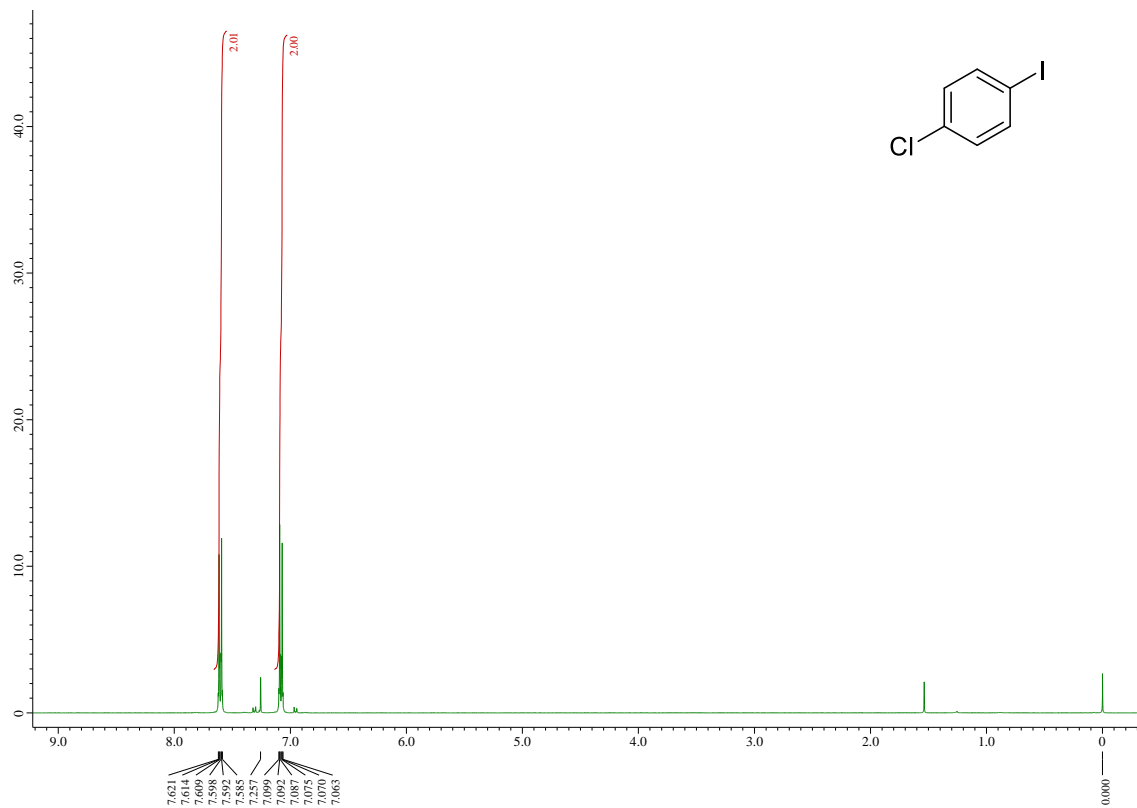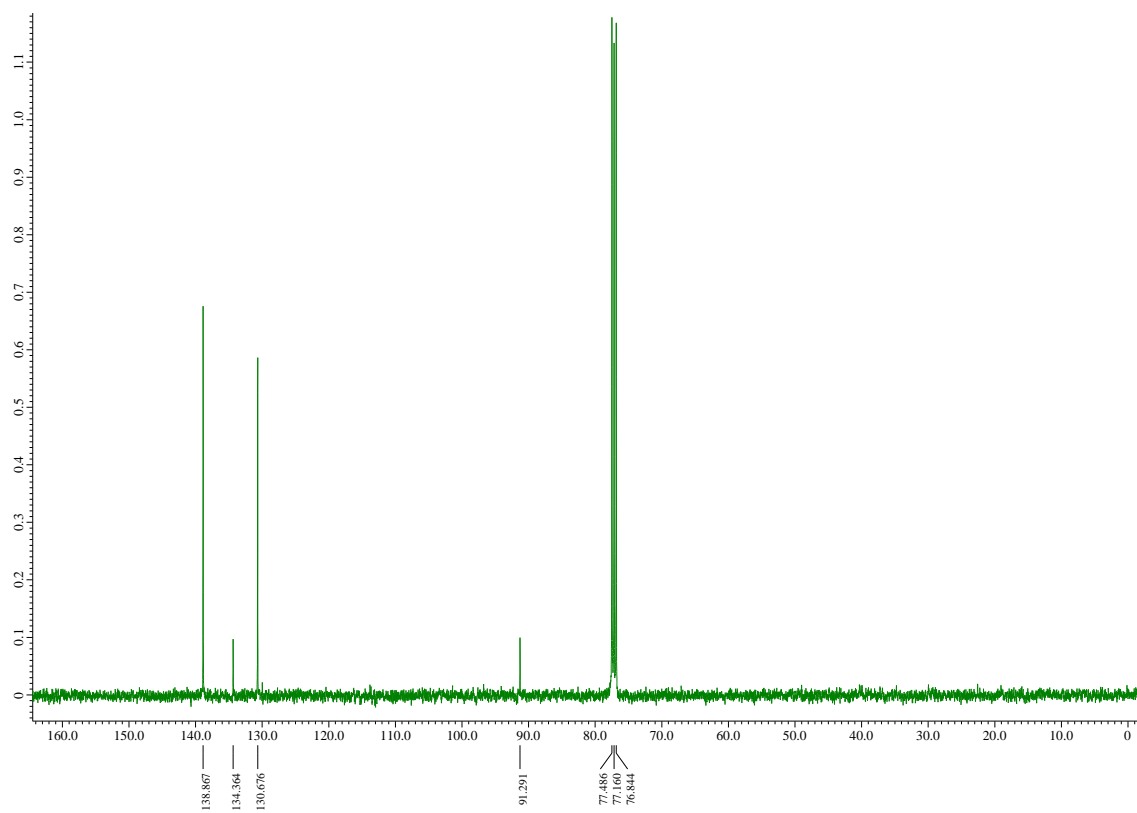

**Figure S2:**  $^1\text{H}$  and  $^{13}\text{C}\{^1\text{H}\}$  NMR Spectra of Compound **2b**

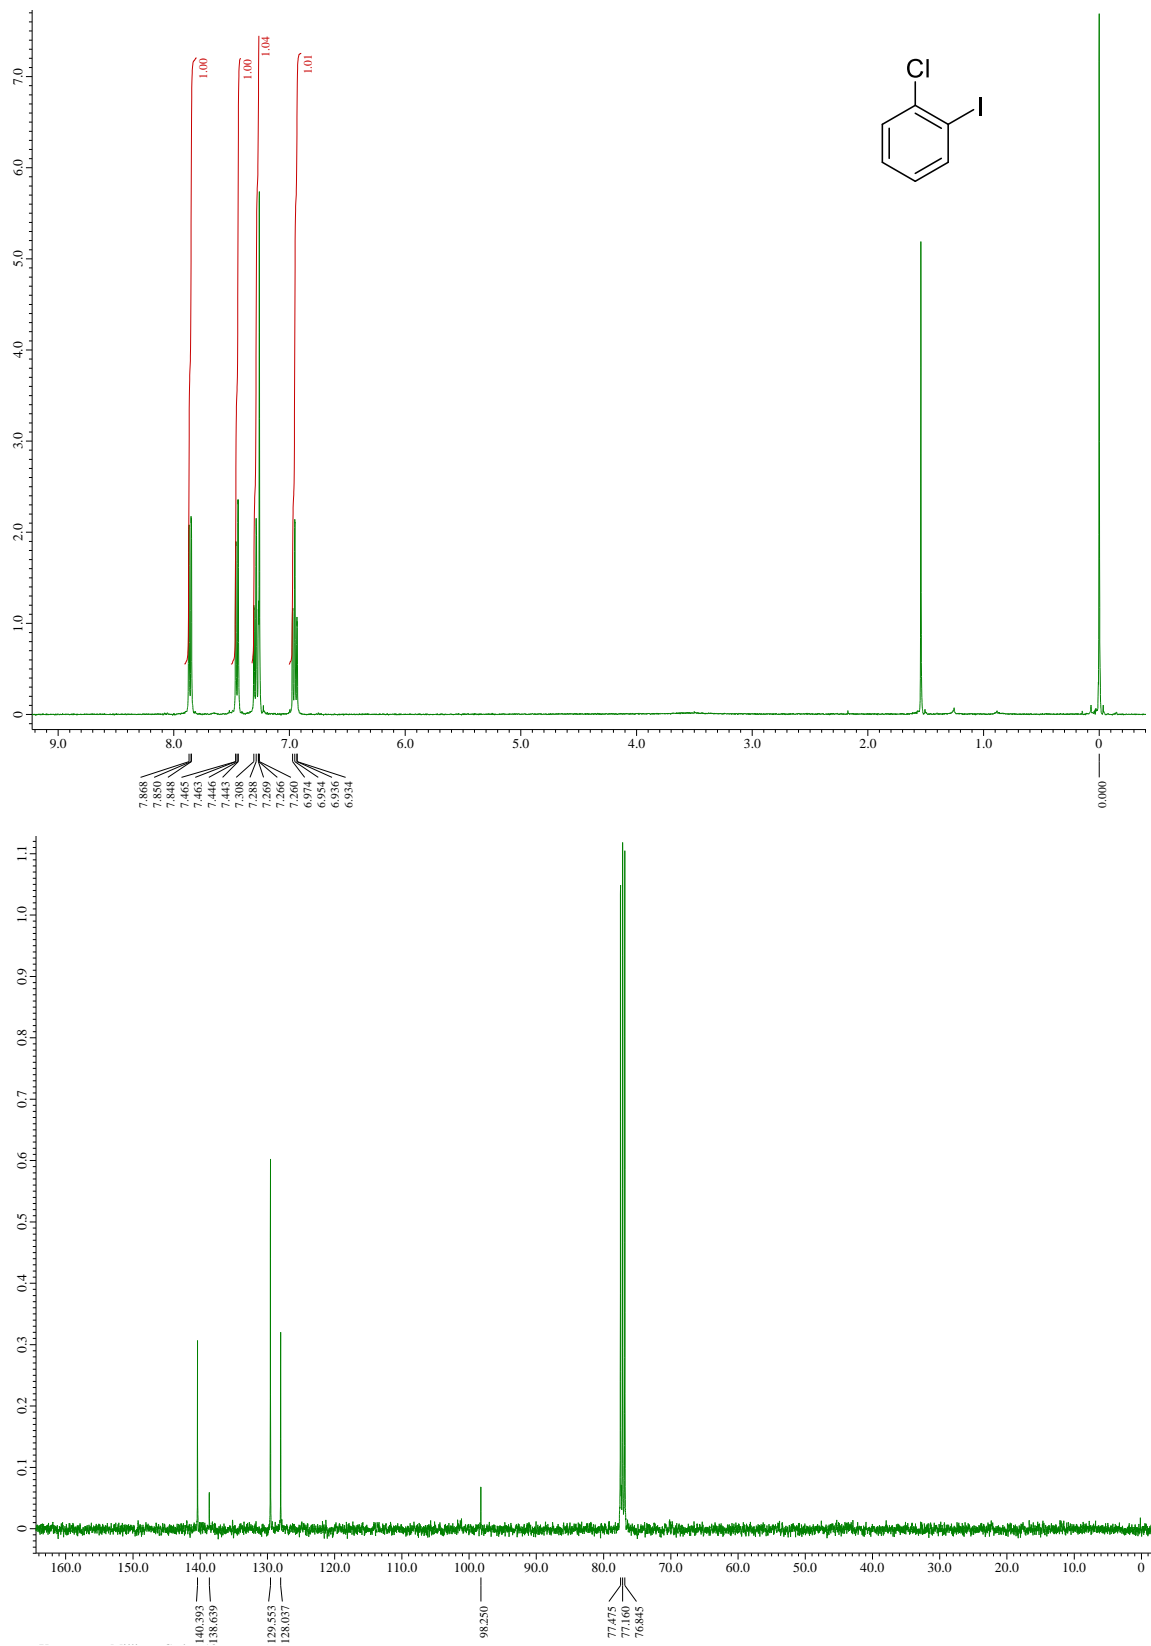

**Figure S3:**  $^1\text{H}$  and  $^{13}\text{C}\{^1\text{H}\}$  NMR Spectra of Compound **2c**

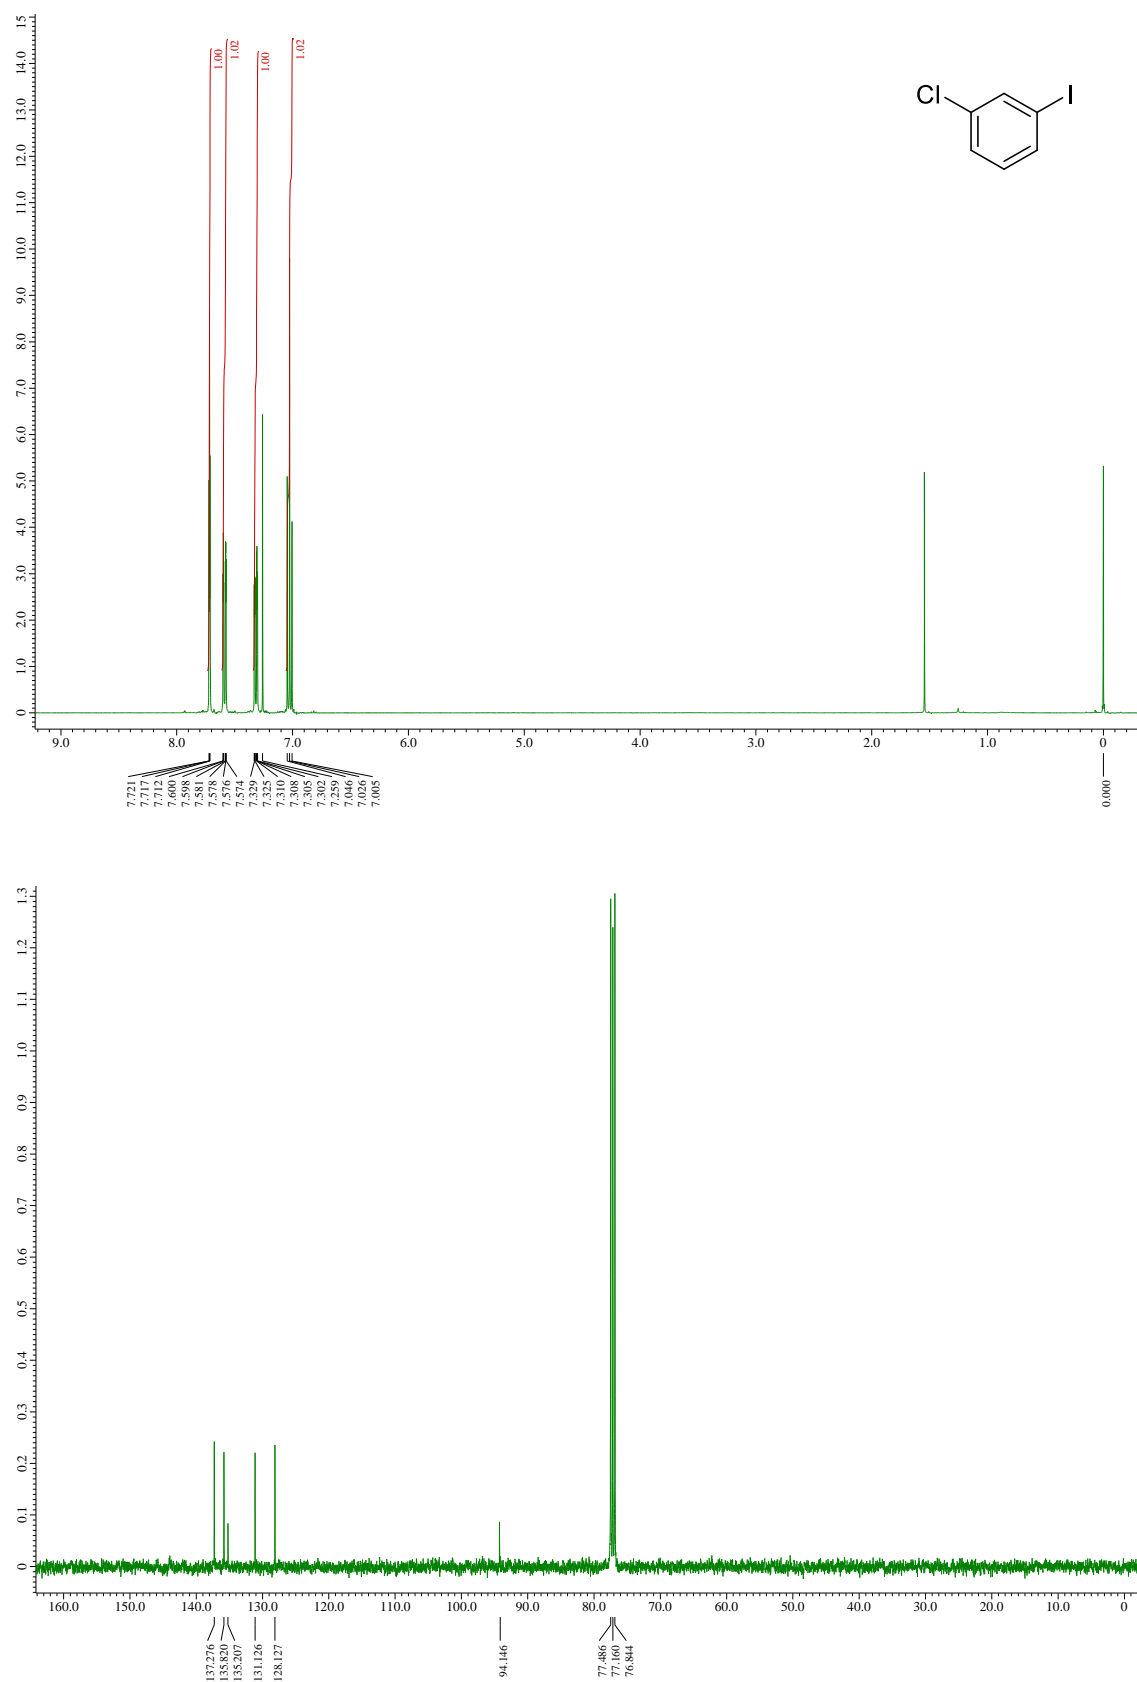

**Figure S4:**  $^1\text{H}$  and  $^{13}\text{C}\{^1\text{H}\}$  NMR Spectra of Compound **2d**

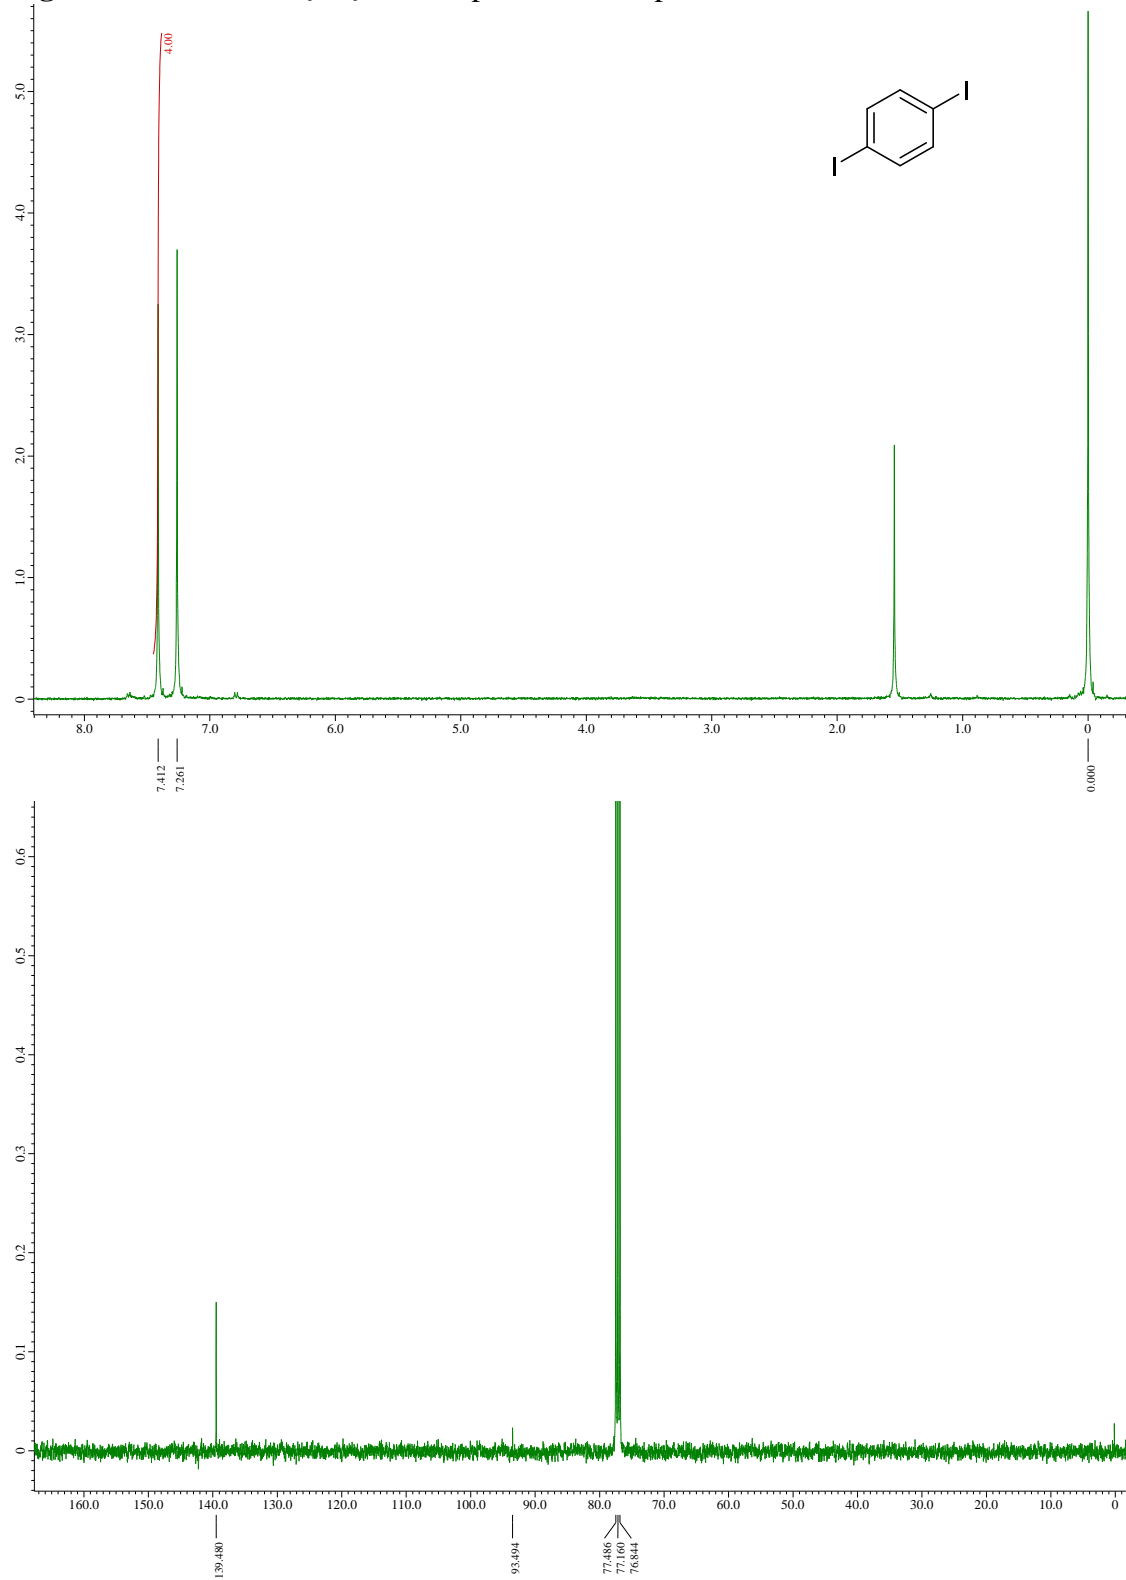

Figure S5:  $^1\text{H}$  and  $^{13}\text{C}\{^1\text{H}\}$  NMR Spectra of Compound 2e

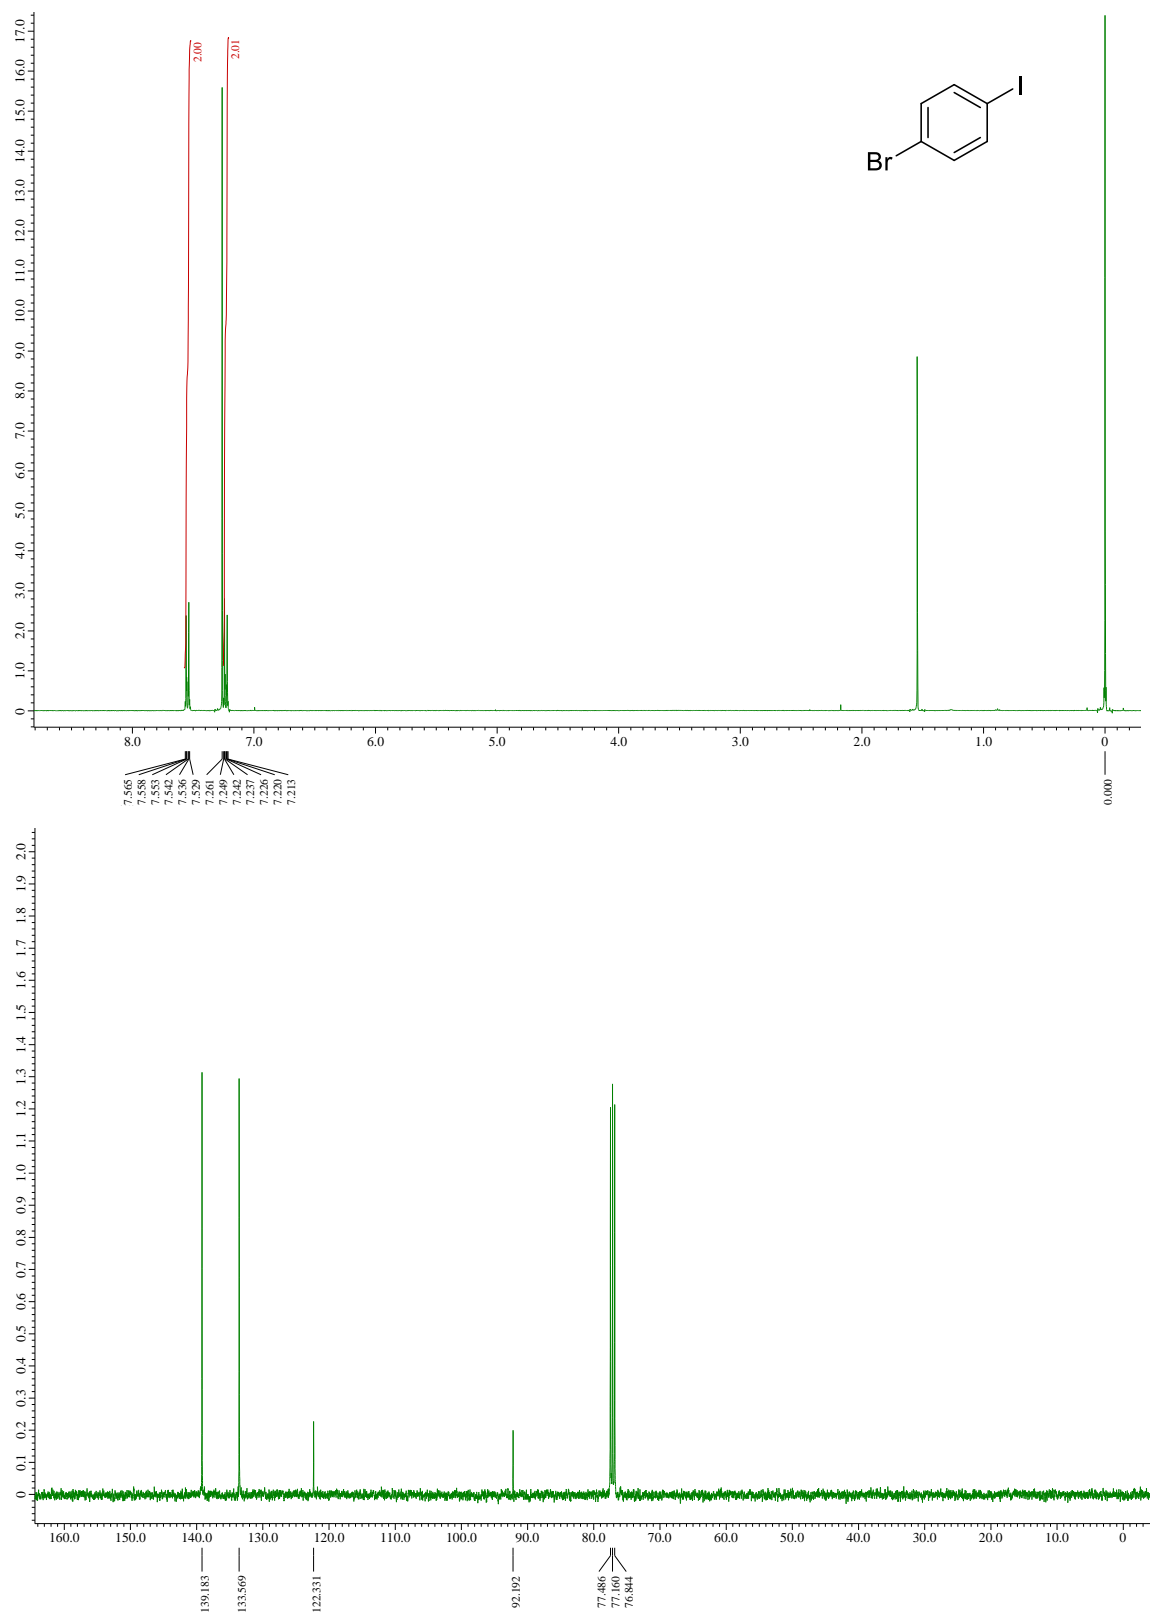

**Figure S6:**  $^1\text{H}$  and  $^{13}\text{C}\{^1\text{H}\}$  NMR Spectra of Compound **2f**

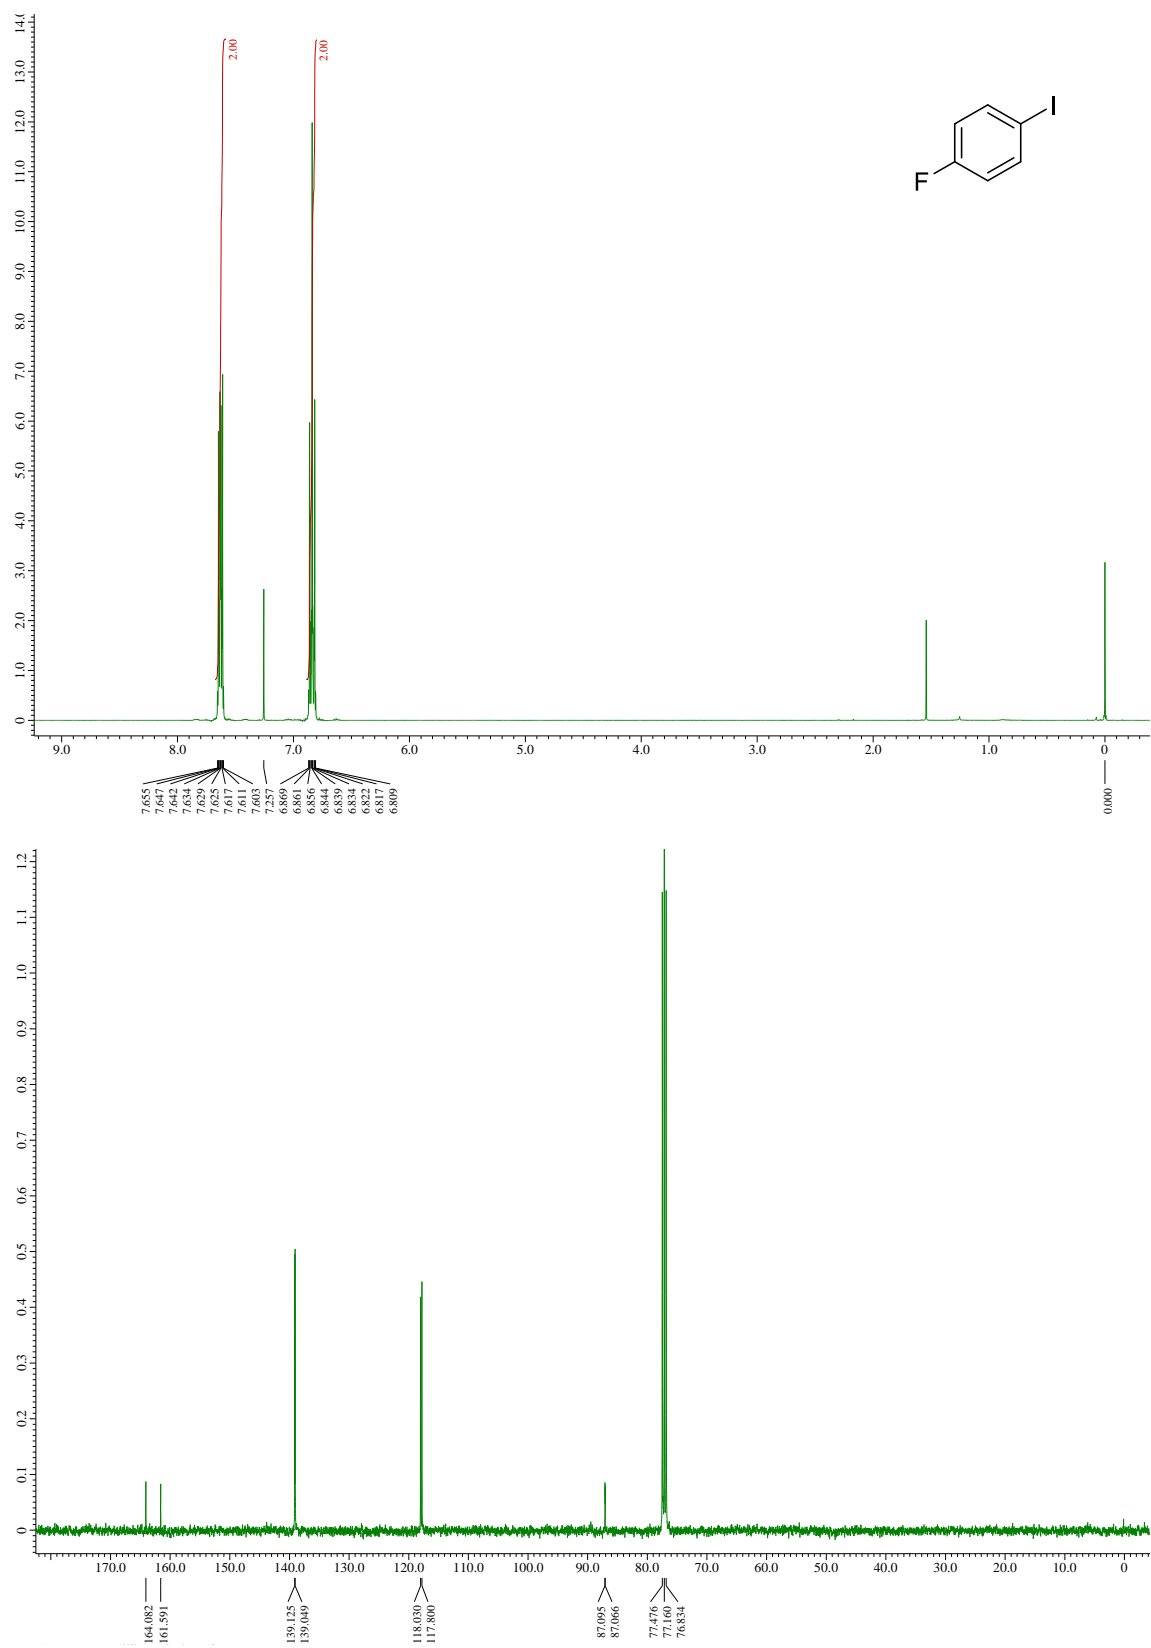



**Figure S7:**  $^1\text{H}$  and  $^{13}\text{C}\{^1\text{H}\}$  NMR Spectra of Compound **2g**

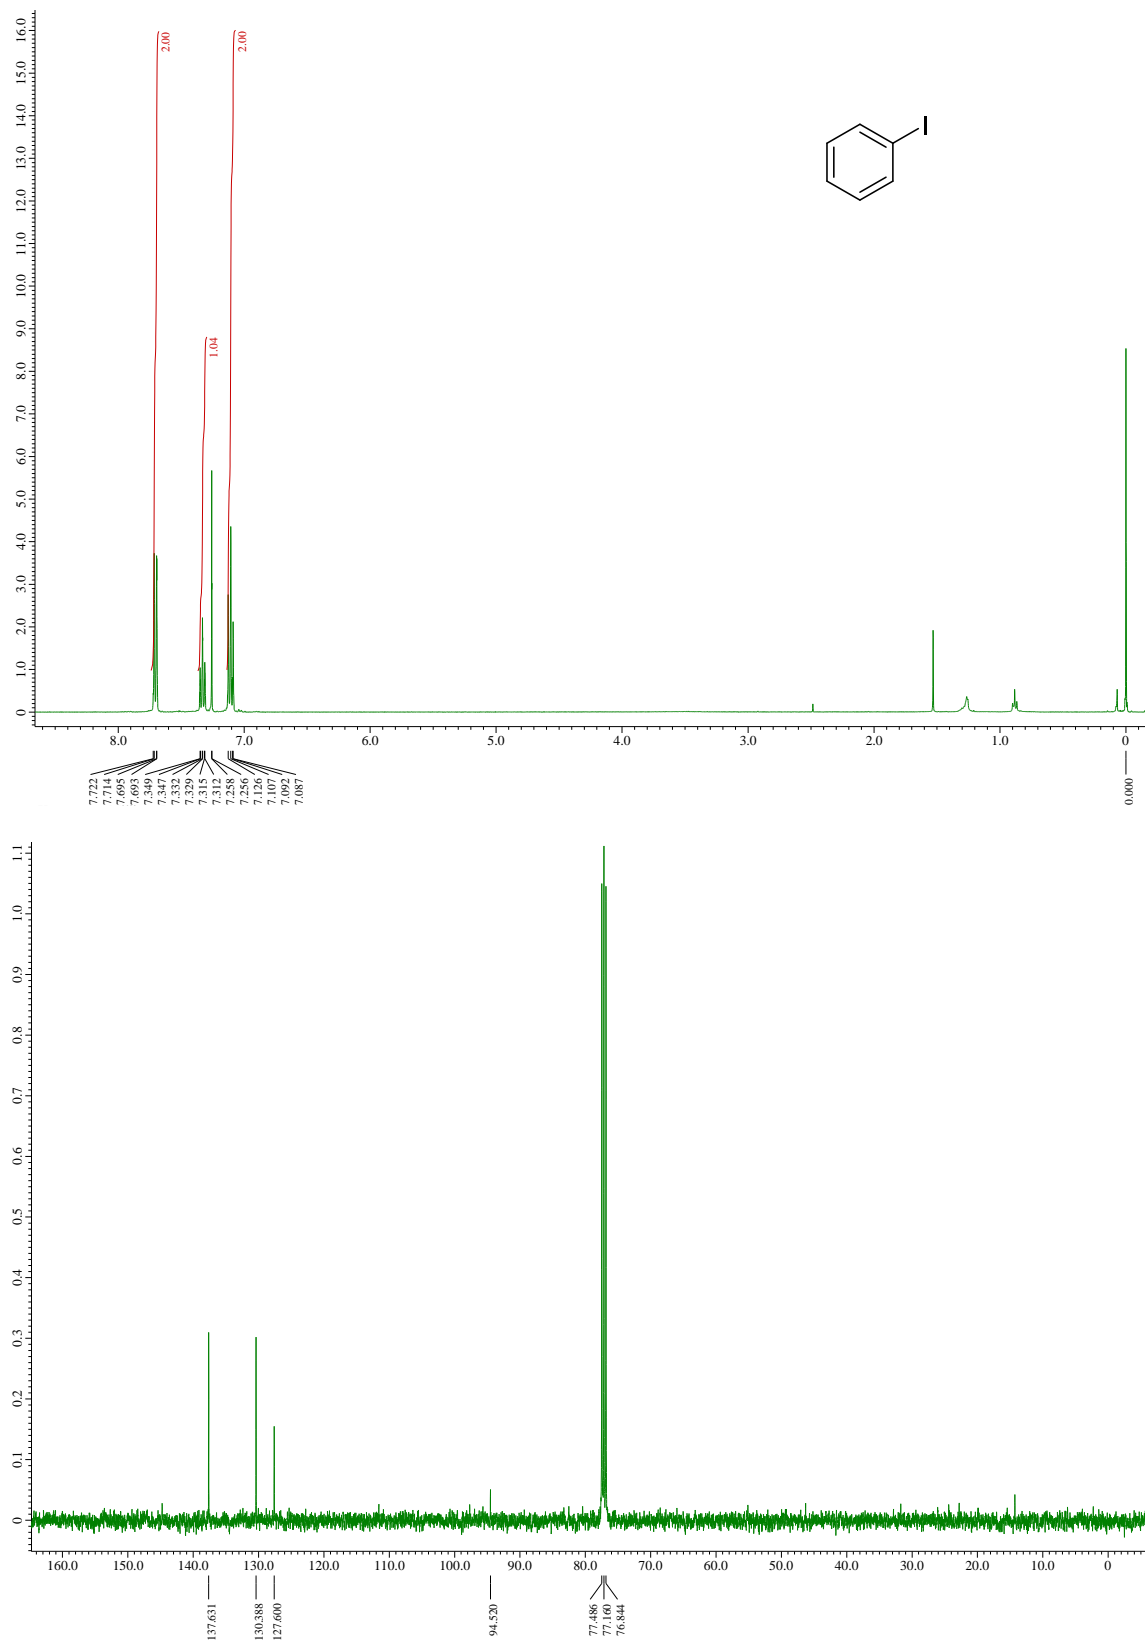

**Figure S8:**  $^1\text{H}$  and  $^{13}\text{C}\{^1\text{H}\}$  NMR Spectra of Compound **2h**

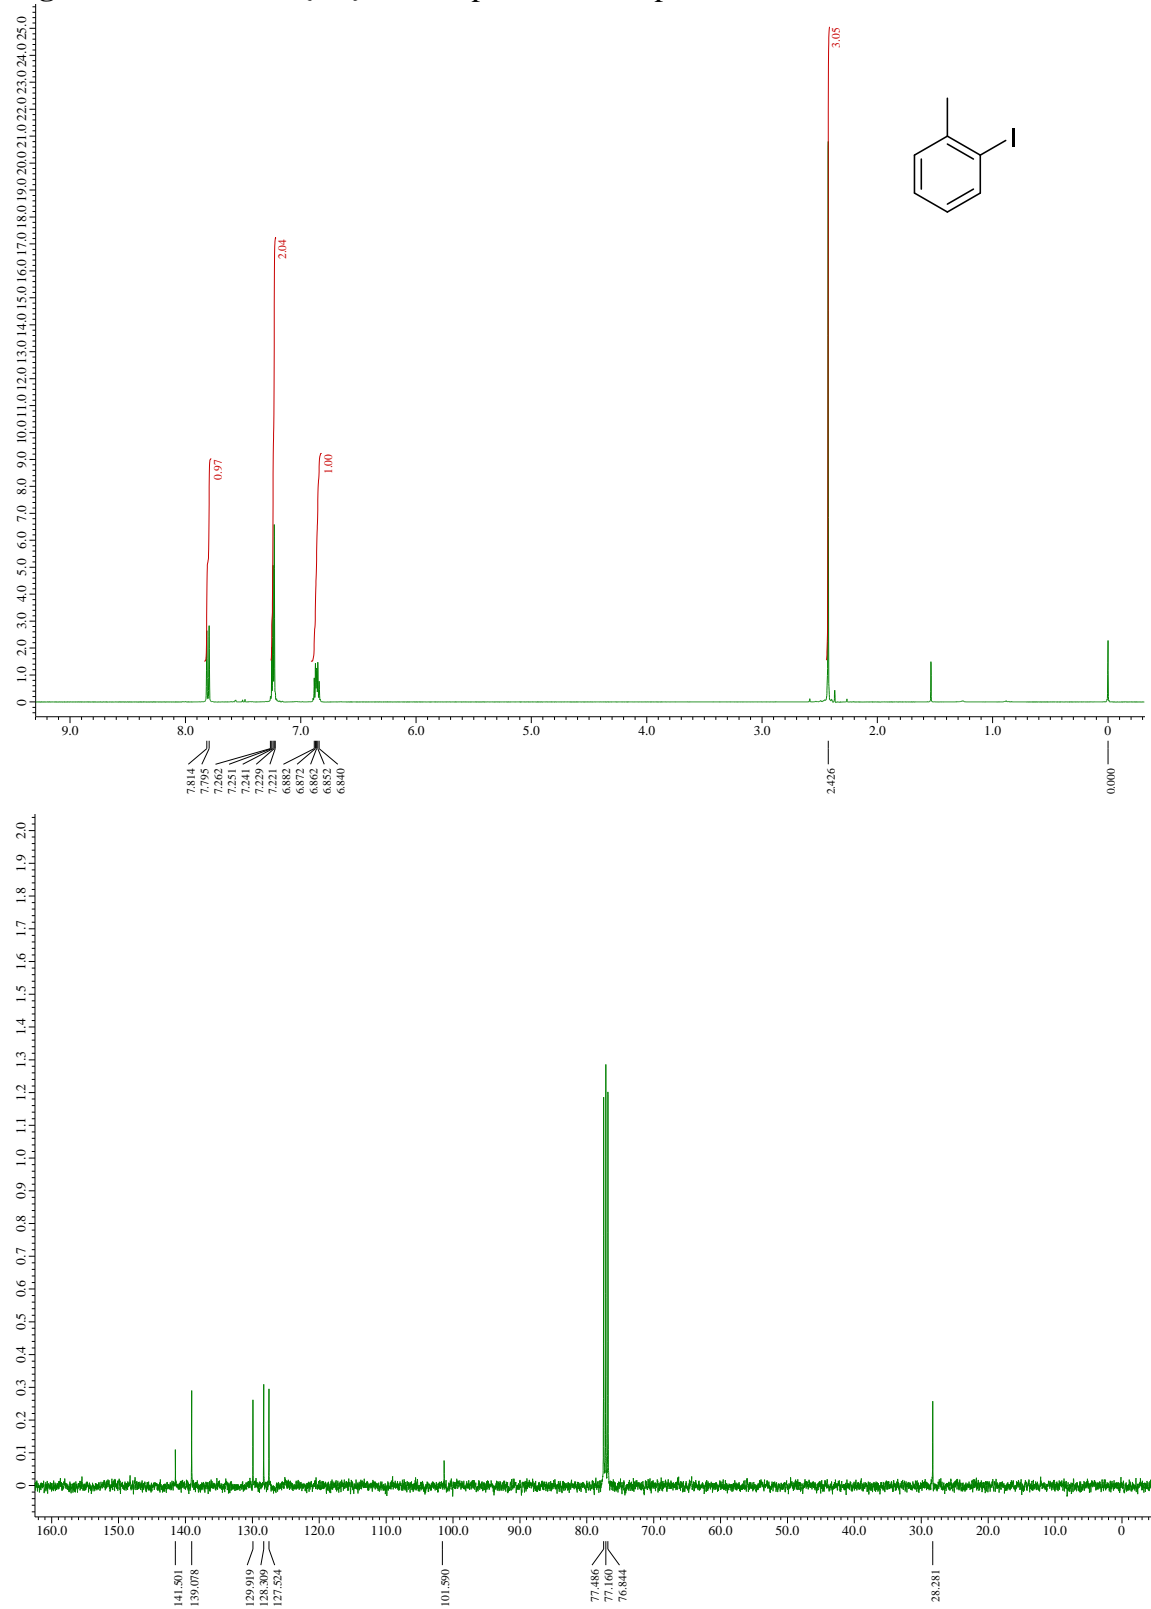

**Figure S9:**  $^1\text{H}$  and  $^{13}\text{C}\{^1\text{H}\}$  NMR Spectra of Compound **2i**

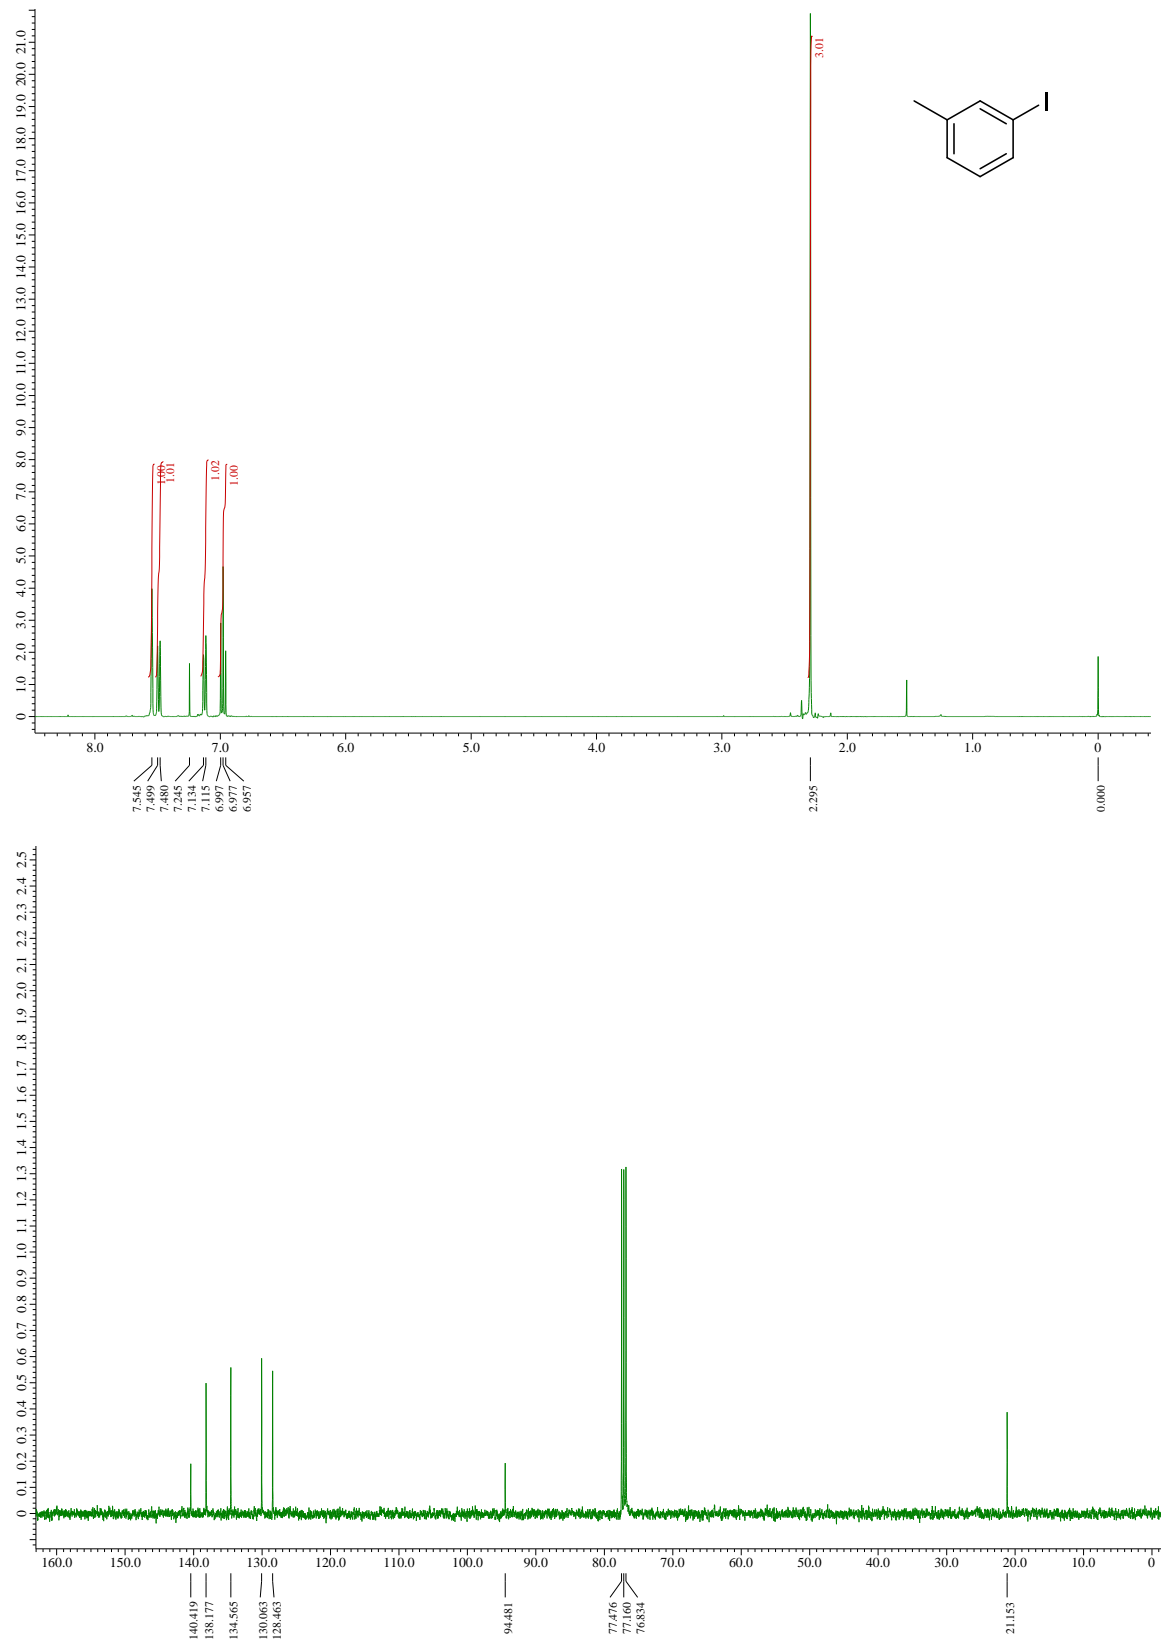

**Figure S10:**  $^1\text{H}$  and  $^{13}\text{C}\{^1\text{H}\}$  NMR Spectra of Compound **2j**

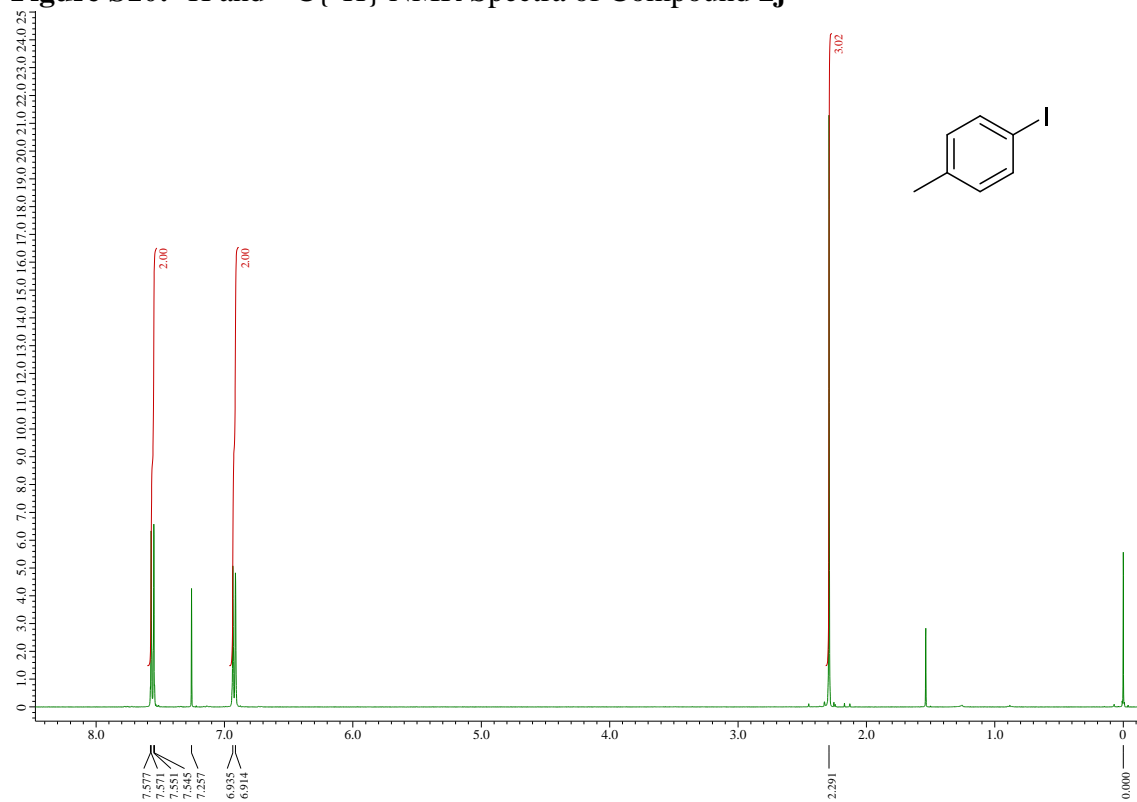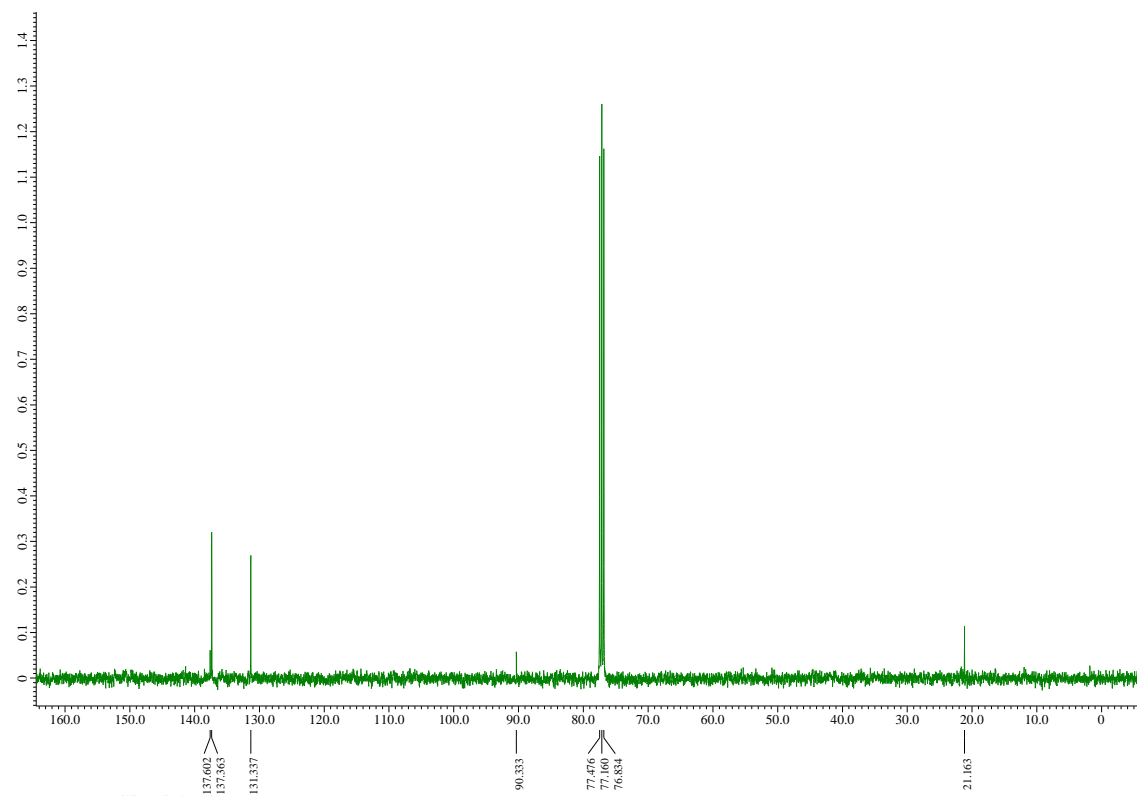

**Figure S11:**  $^1\text{H}$  and  $^{13}\text{C}\{^1\text{H}\}$  NMR Spectra of Compound **2k**

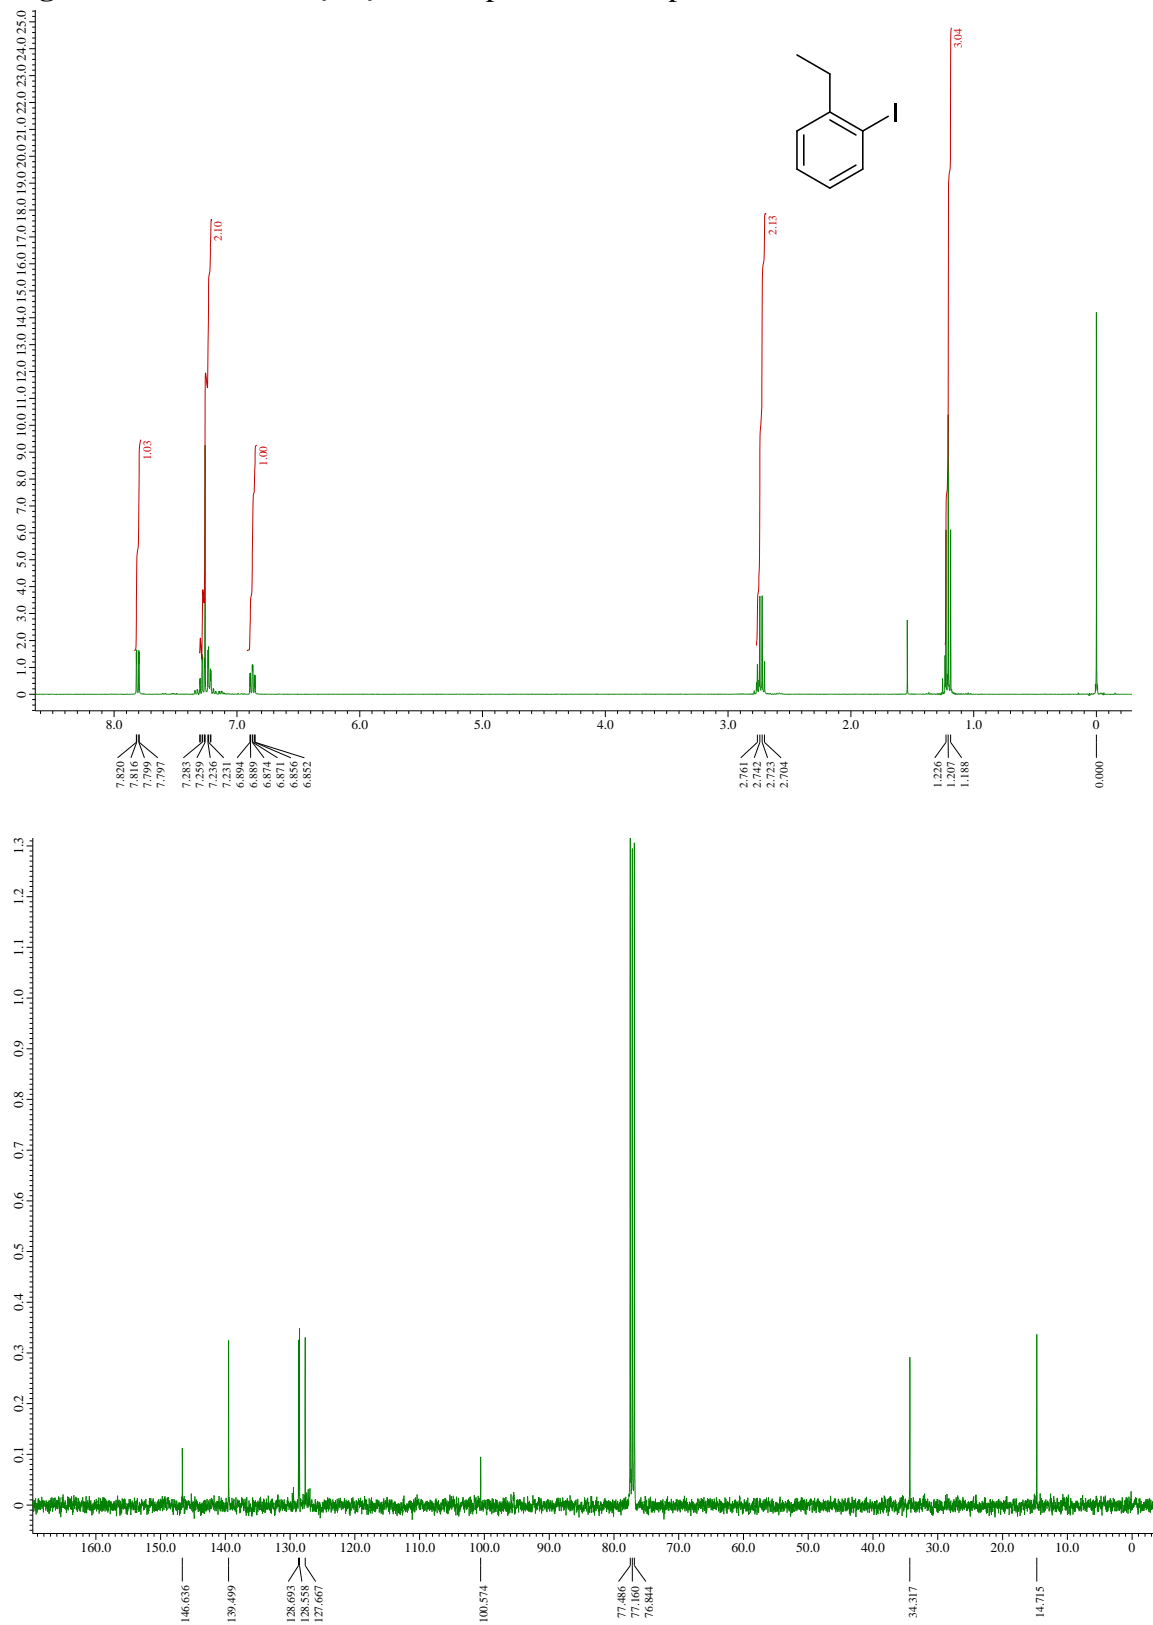

**Figure S12:**  $^1\text{H}$  and  $^{13}\text{C}\{^1\text{H}\}$  NMR Spectra of Compound **2l**

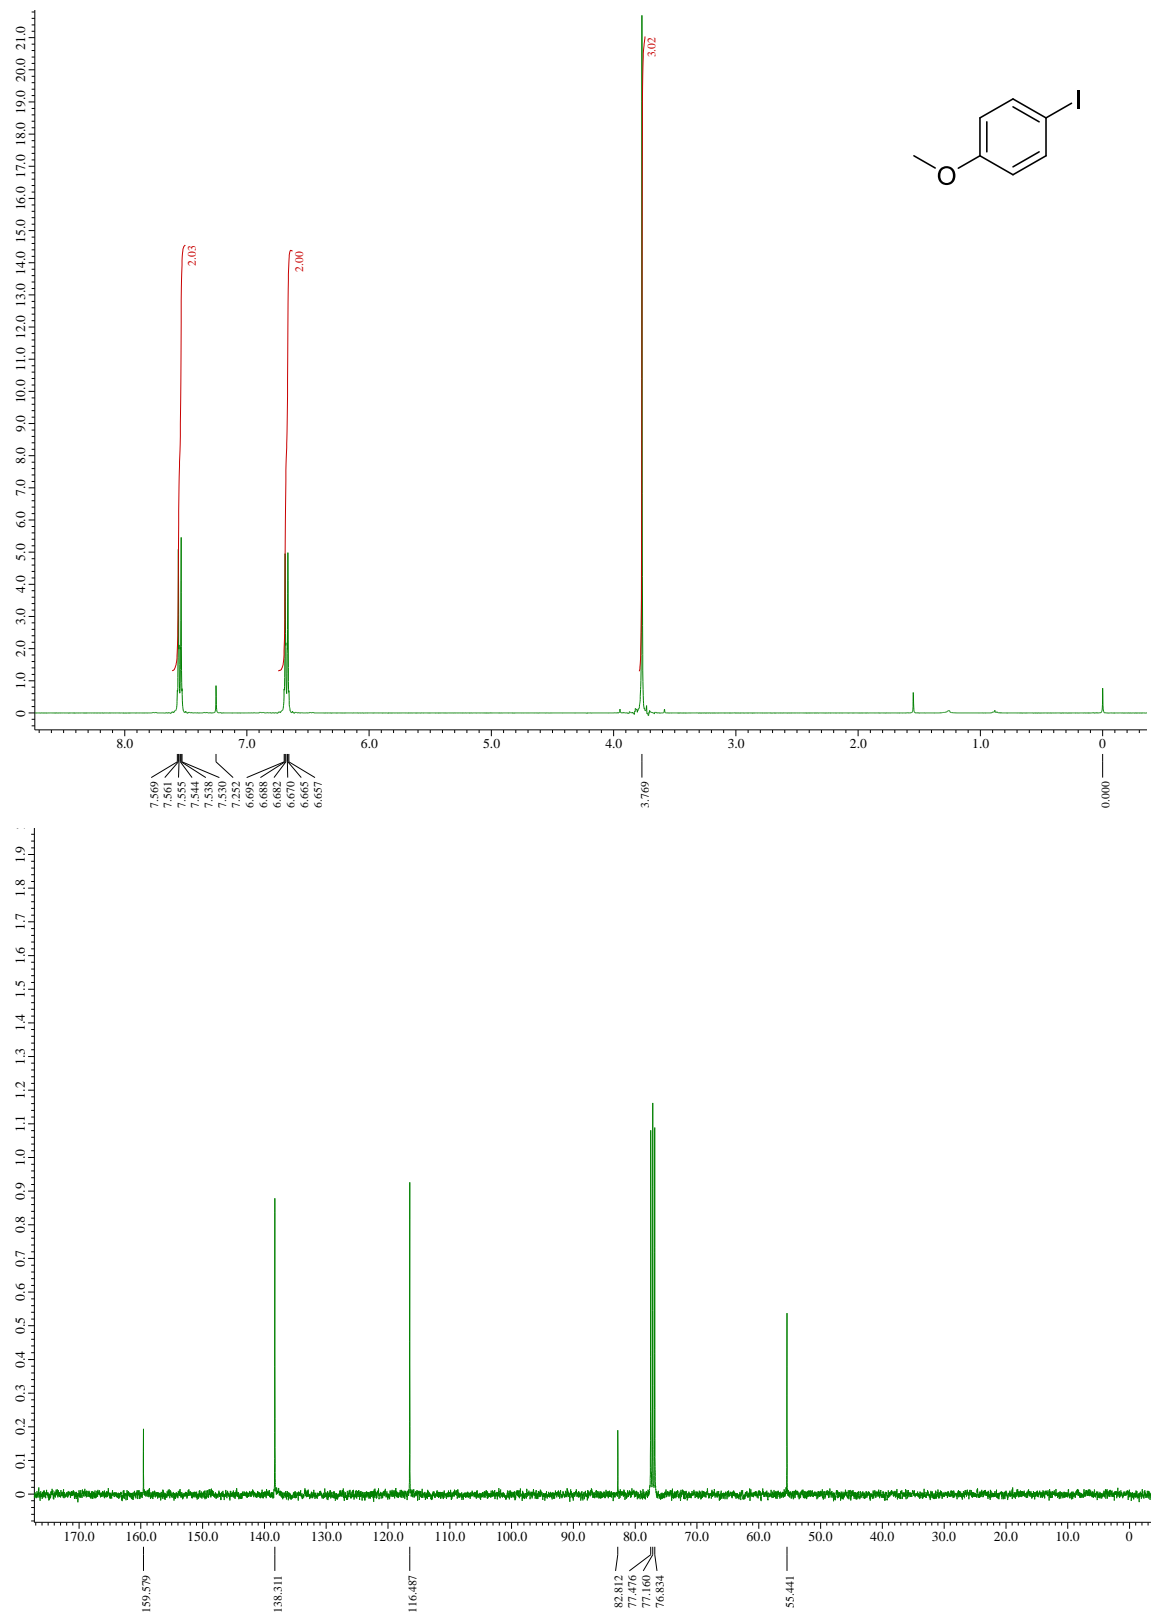

**Figure S13:**  $^1\text{H}$  and  $^{13}\text{C}\{^1\text{H}\}$  NMR Spectra of Compound **2m**

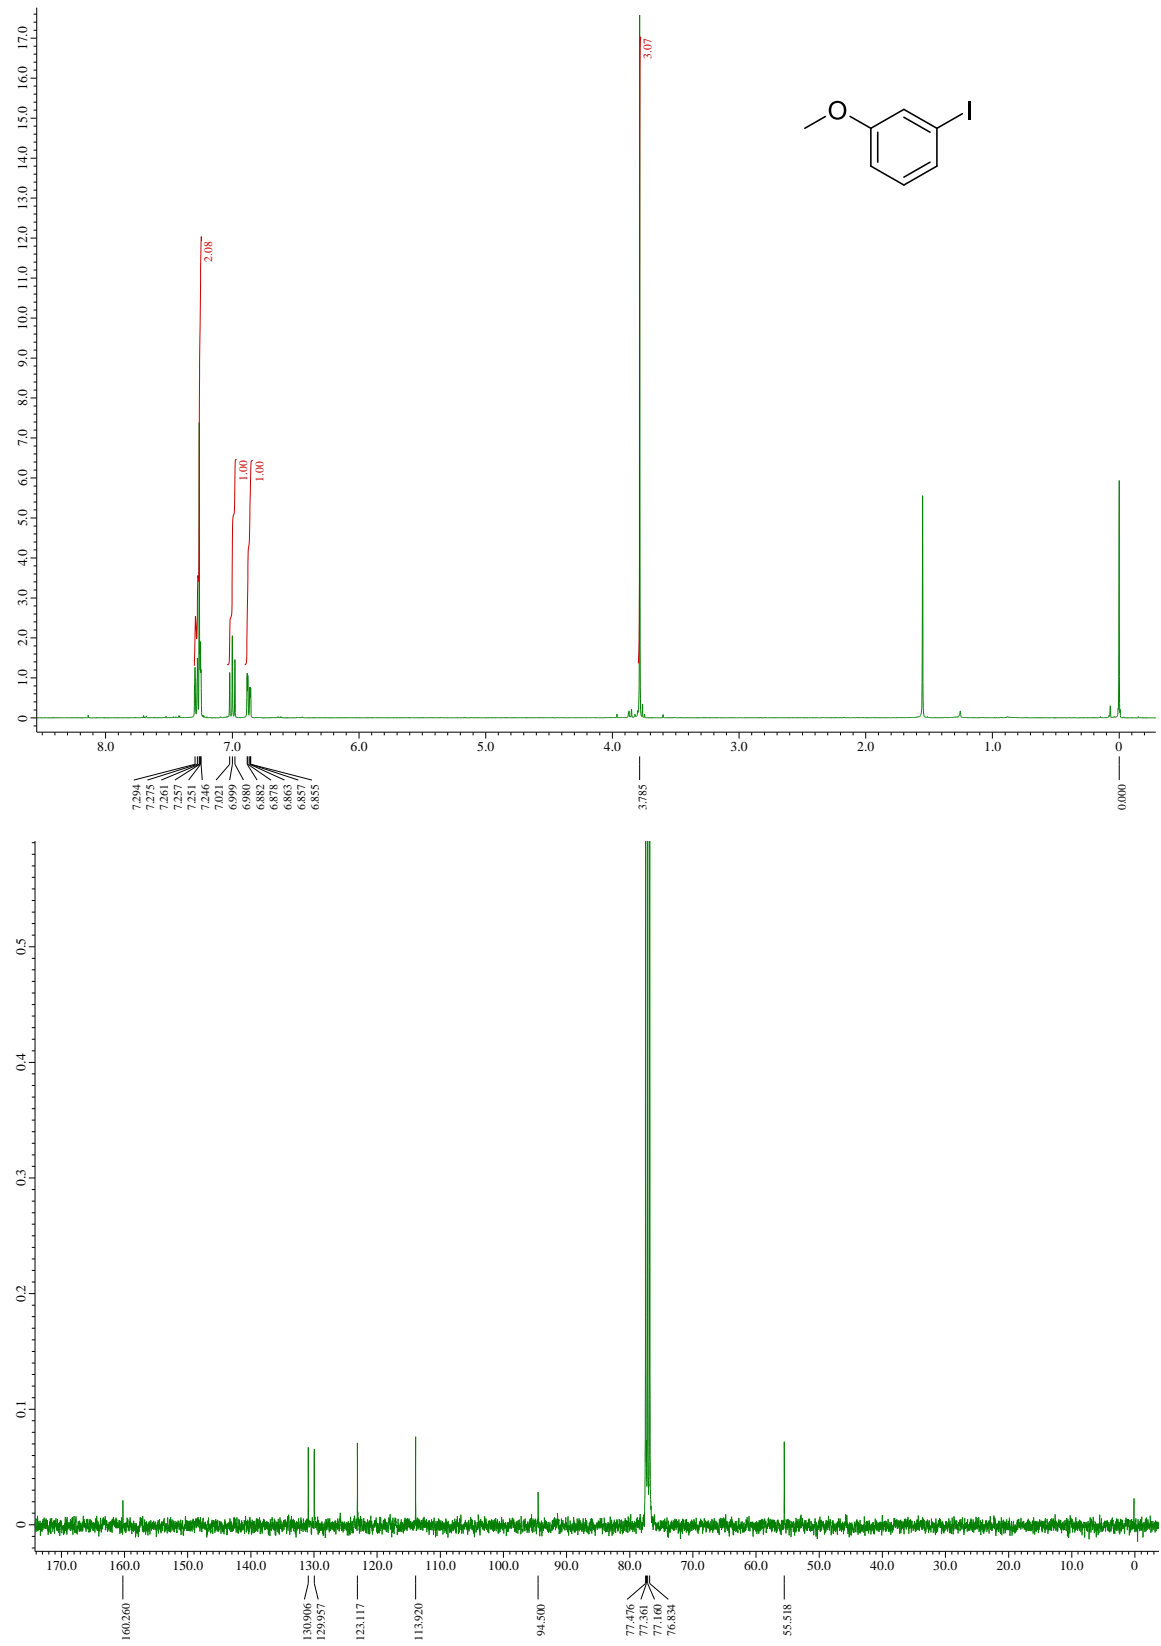

**Figure S14:**  $^1\text{H}$  and  $^{13}\text{C}\{^1\text{H}\}$  NMR Spectra of Compound **2n**

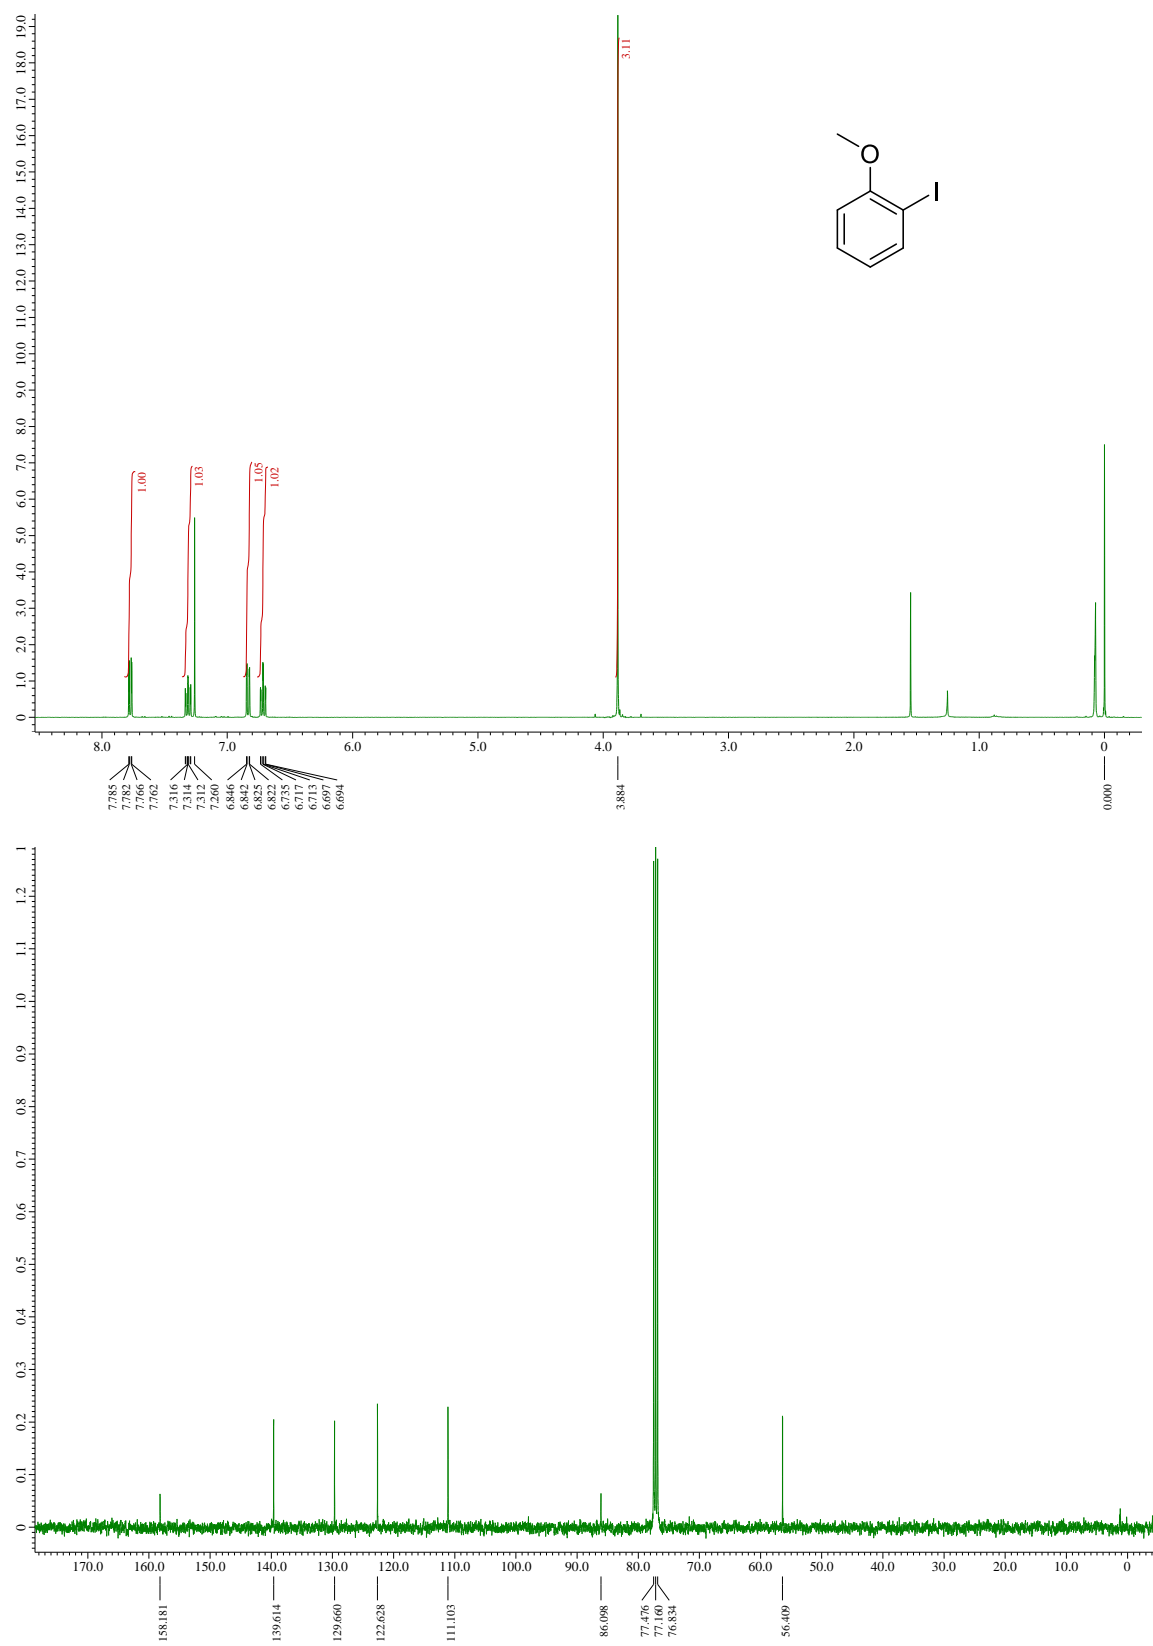



**Figure S15:**  $^1\text{H}$  and  $^{13}\text{C}\{^1\text{H}\}$  NMR Spectra of Compound **2o**

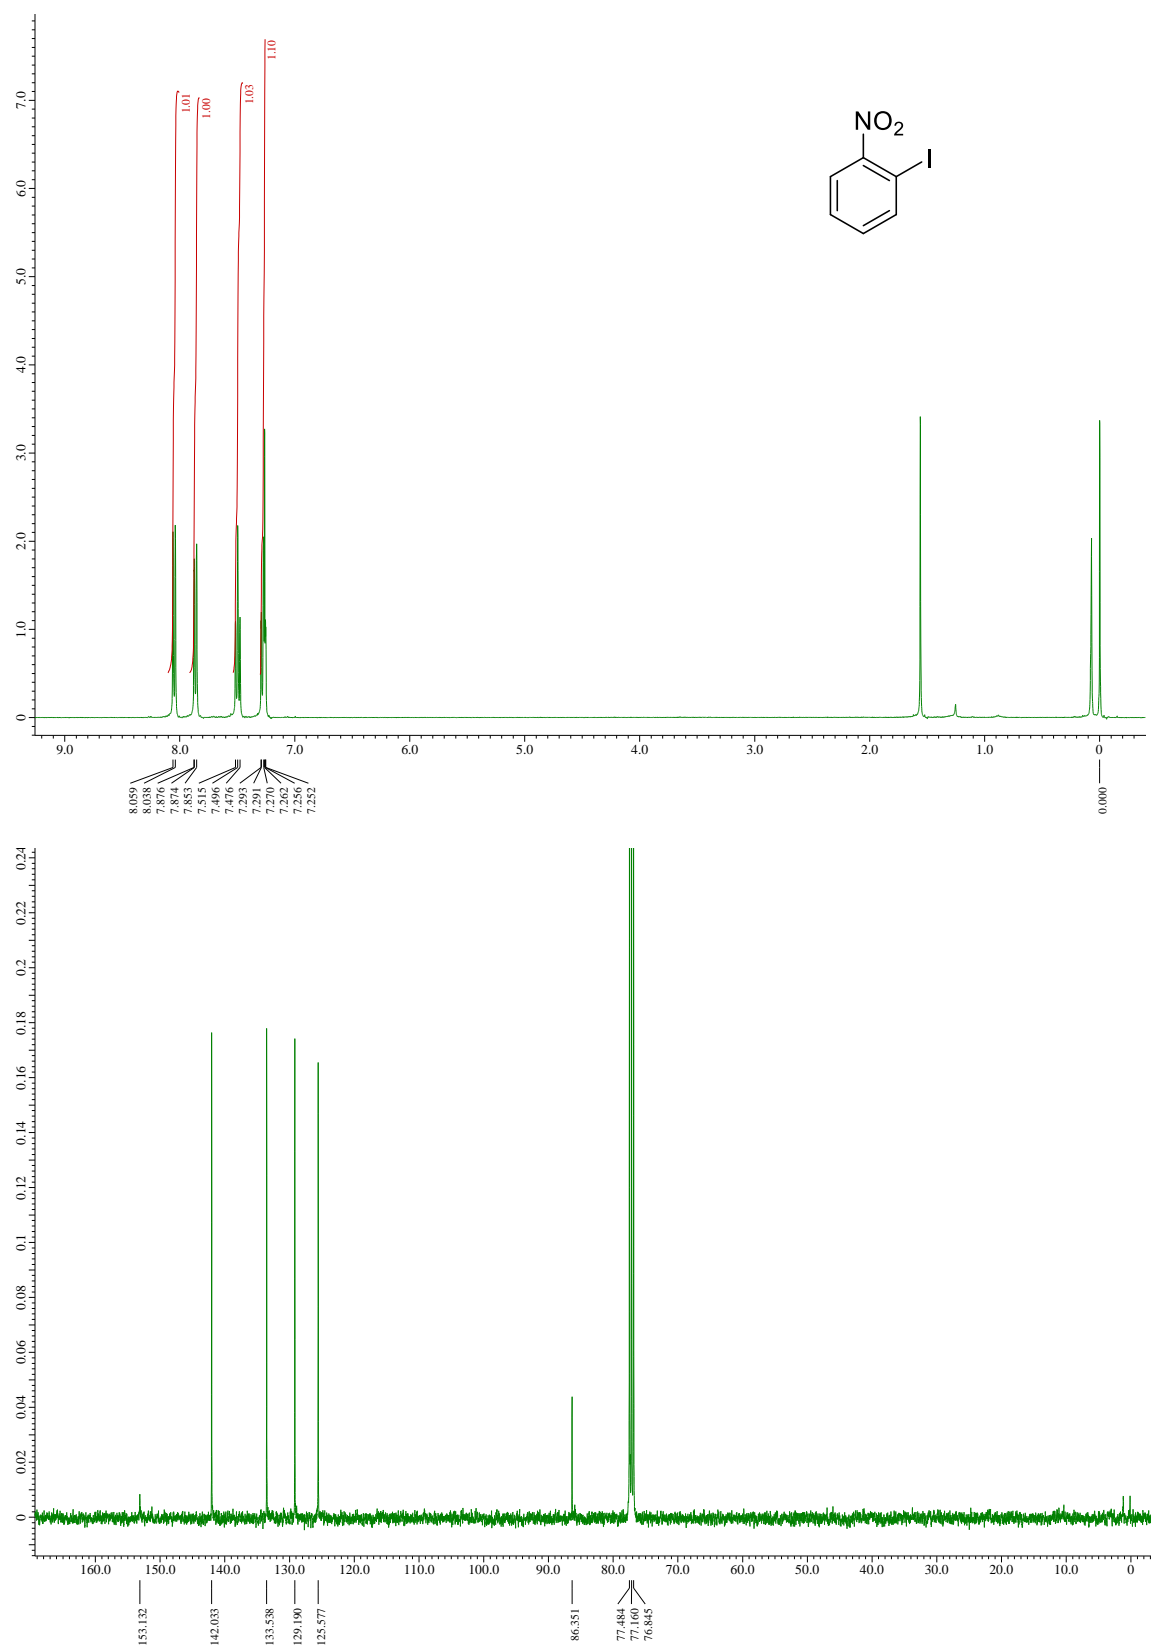

Figure S16:  $^1\text{H}$  and  $^{13}\text{C}\{^1\text{H}\}$  NMR Spectra of Compound **2p**

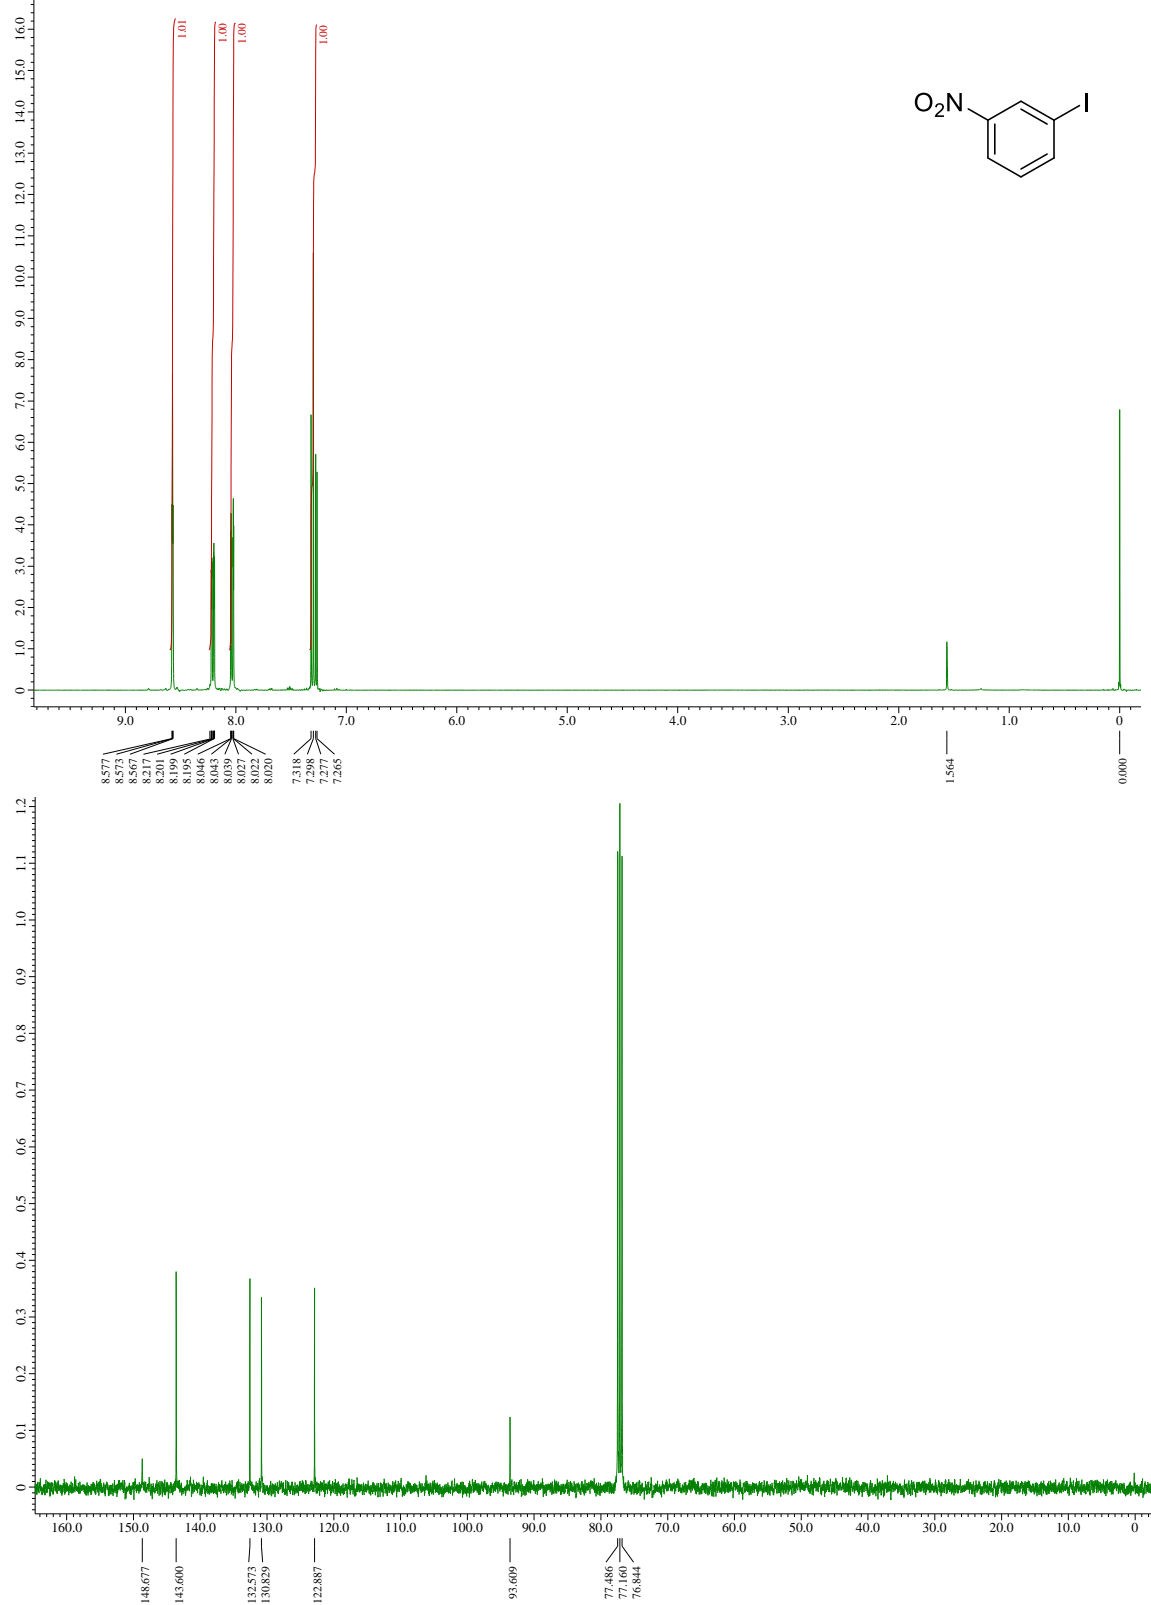

**Figure S17:**  $^1\text{H}$  and  $^{13}\text{C}\{^1\text{H}\}$  NMR Spectra of Compound **2q**

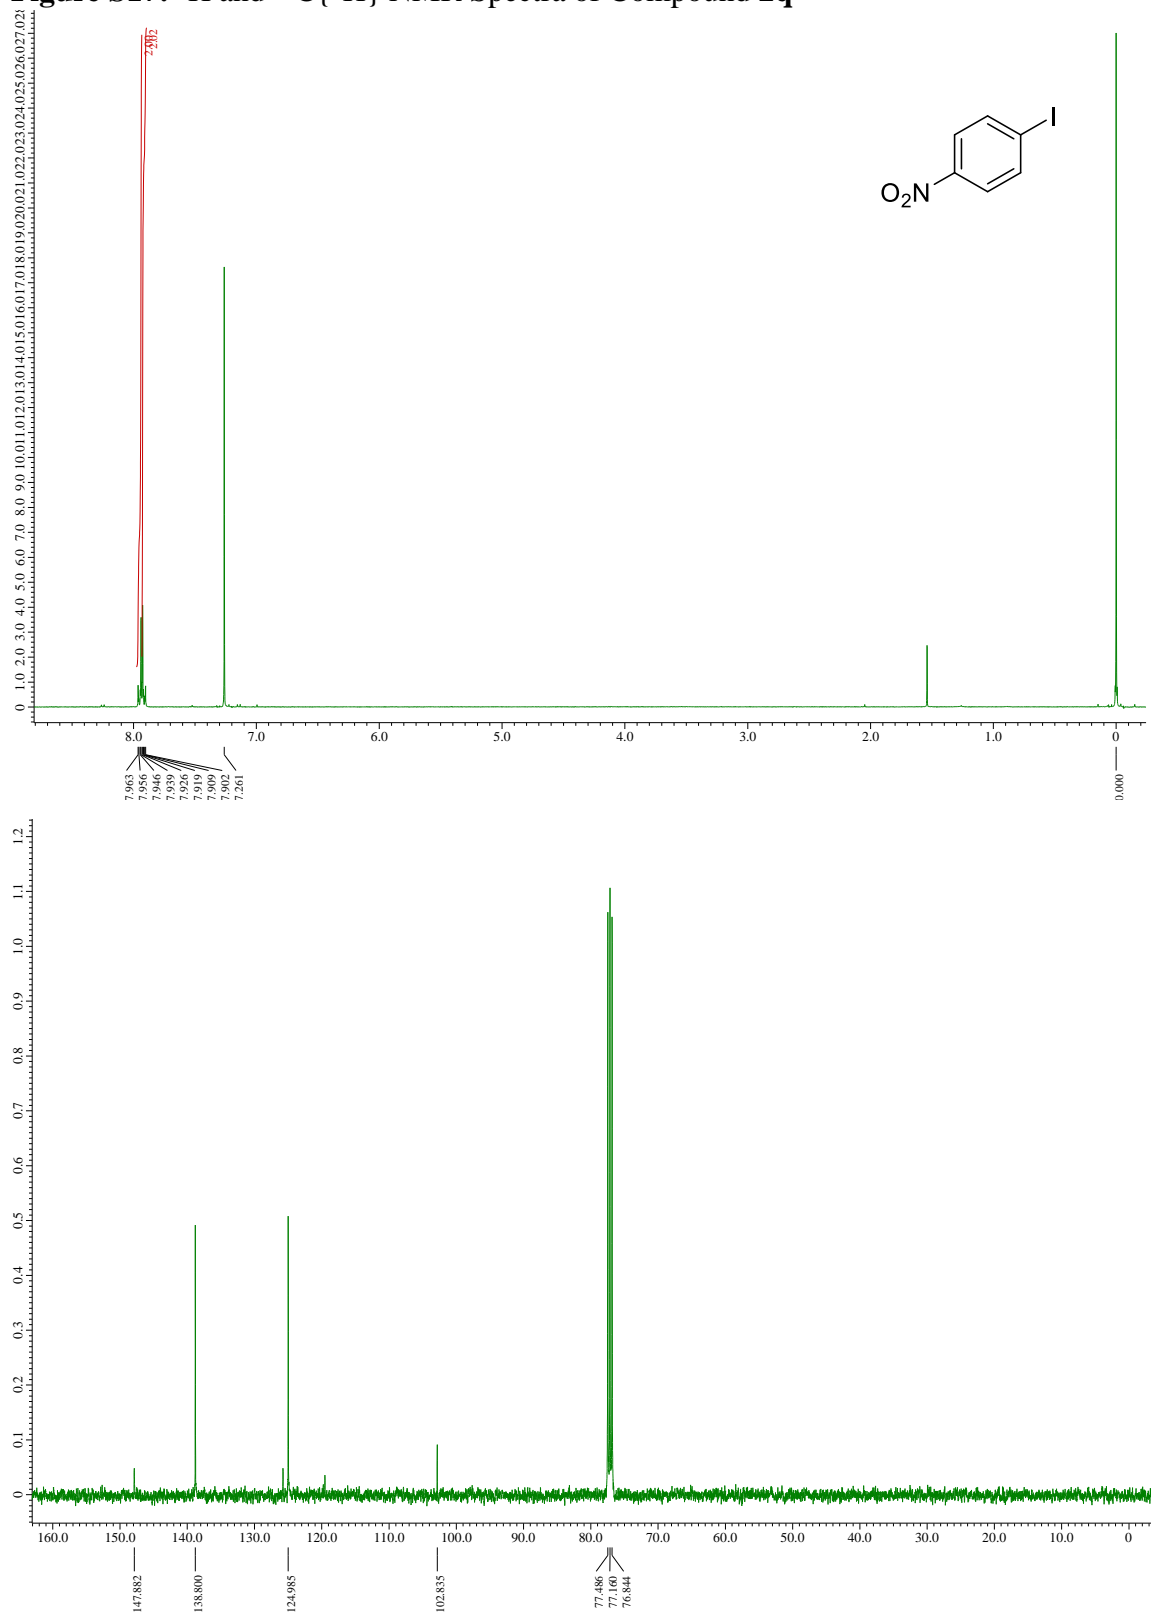

**Figure S18:**  $^1\text{H}$  and  $^{13}\text{C}\{^1\text{H}\}$  NMR Spectra of Compound **2r**

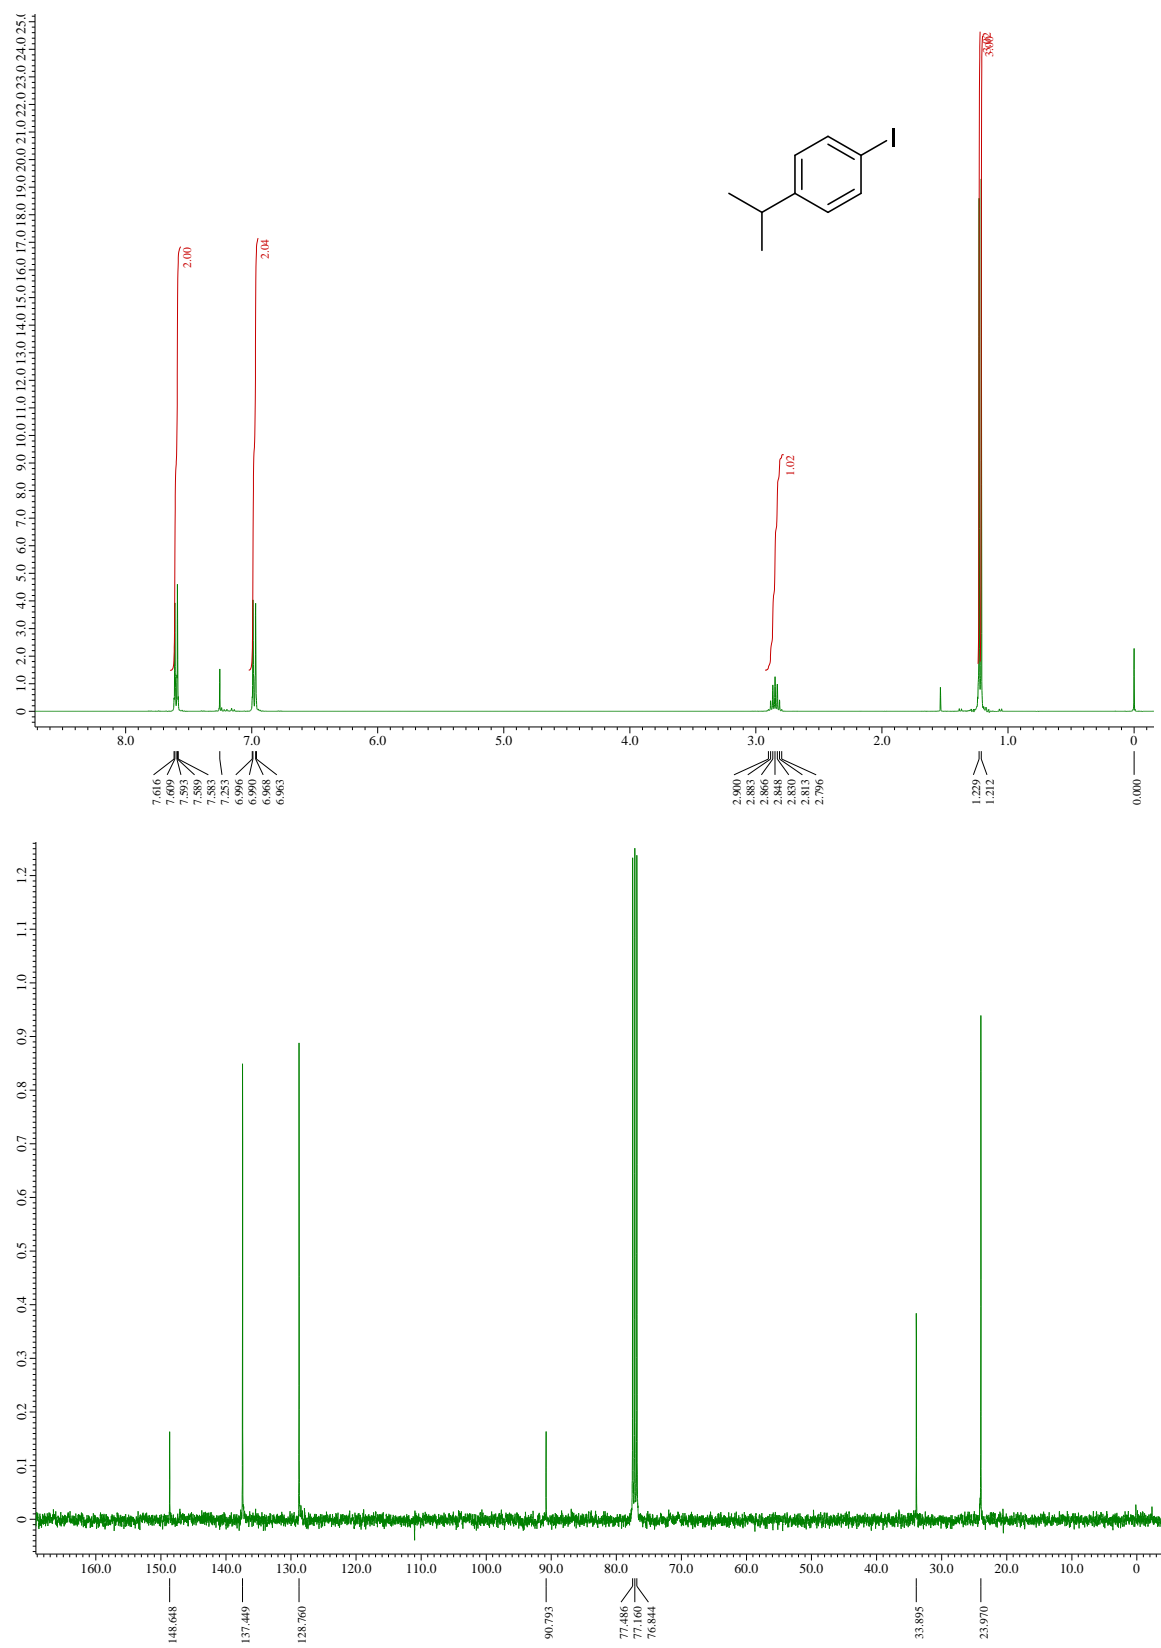

**Figure S19:**  $^1\text{H}$  and  $^{13}\text{C}\{^1\text{H}\}$  NMR Spectra of Compound **2s**

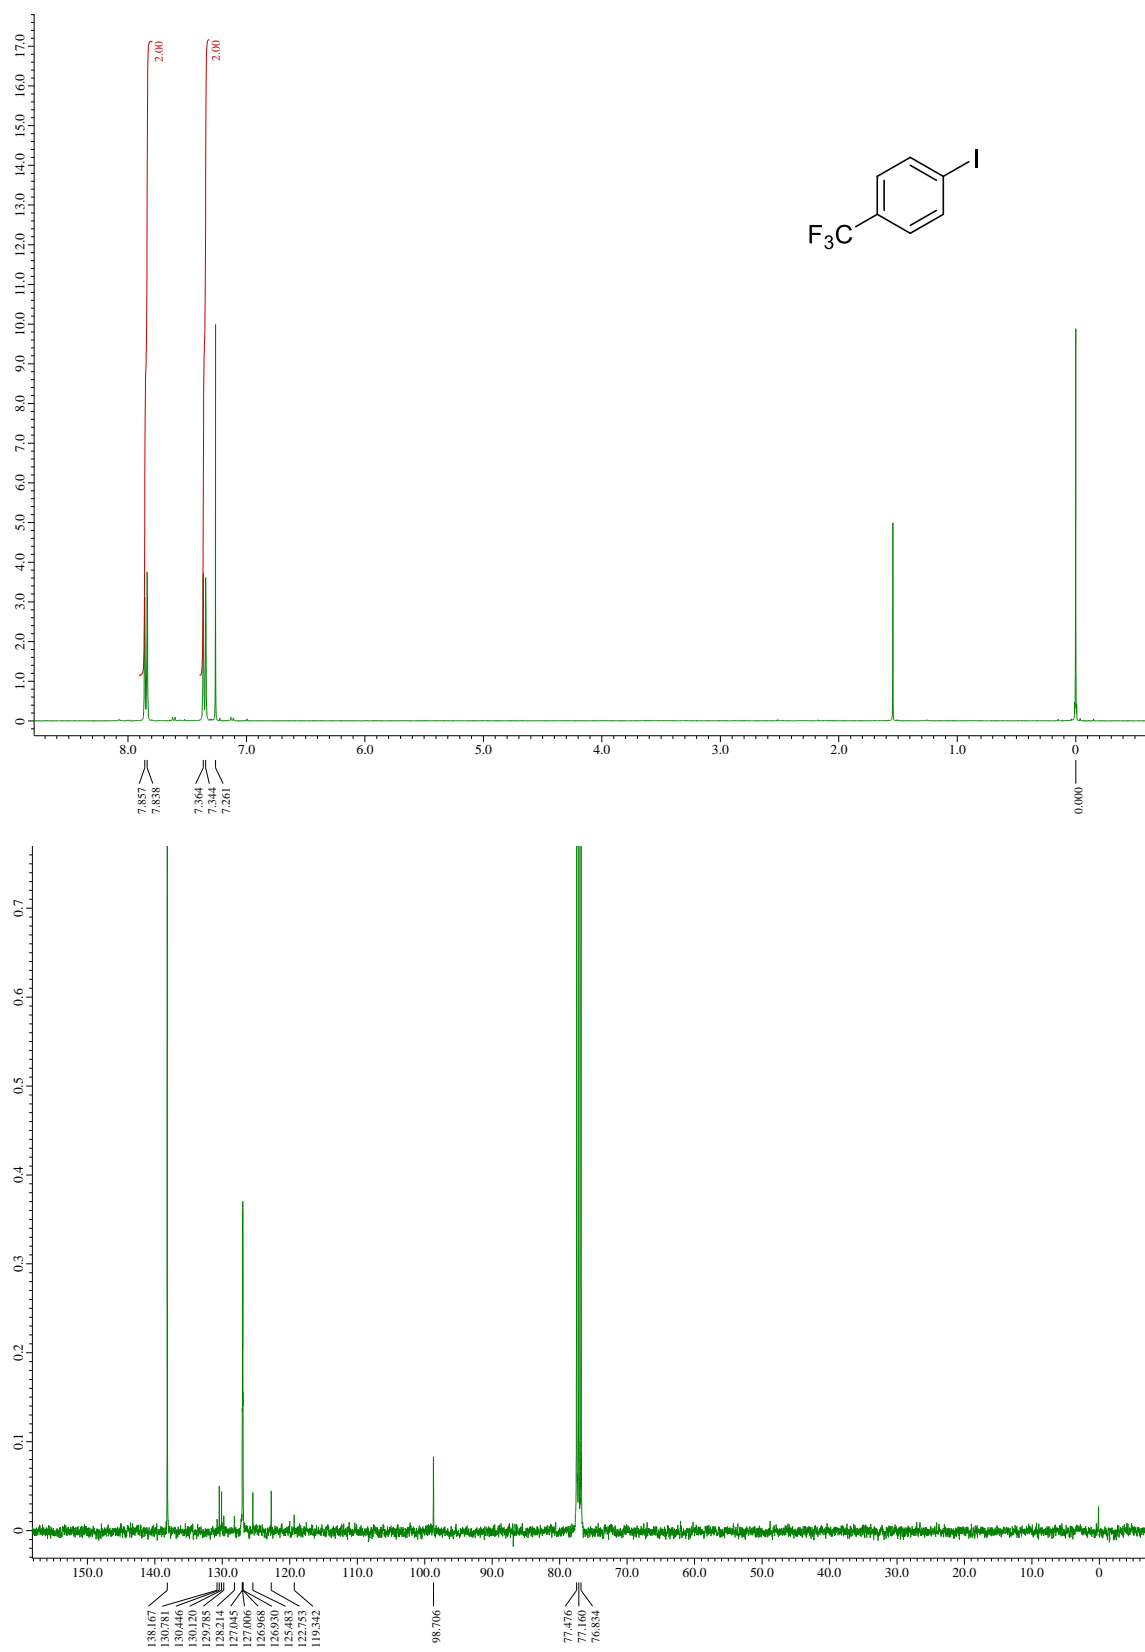

**Figure S20:**  $^1\text{H}$  and  $^{13}\text{C}\{^1\text{H}\}$  NMR Spectra of Compound **2t**

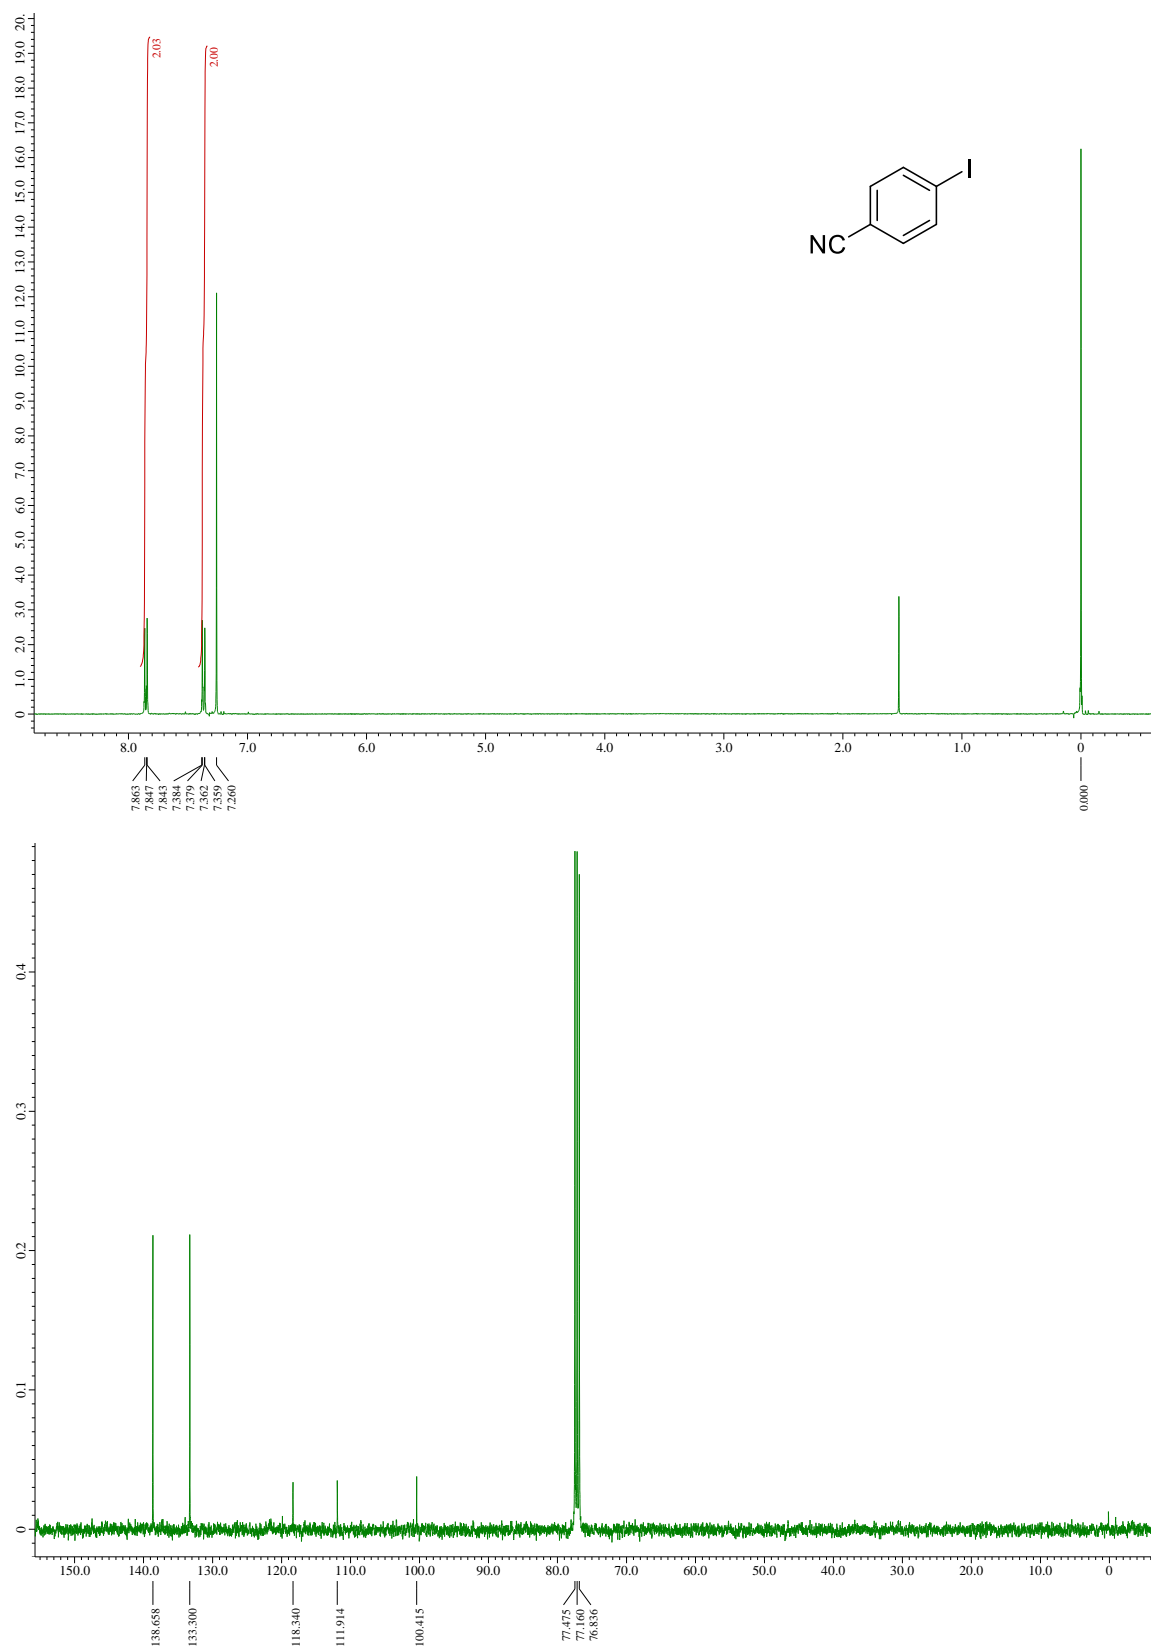

Figure S21:  $^1\text{H}$  and  $^{13}\text{C}\{^1\text{H}\}$  NMR Spectra of Compound **2u**

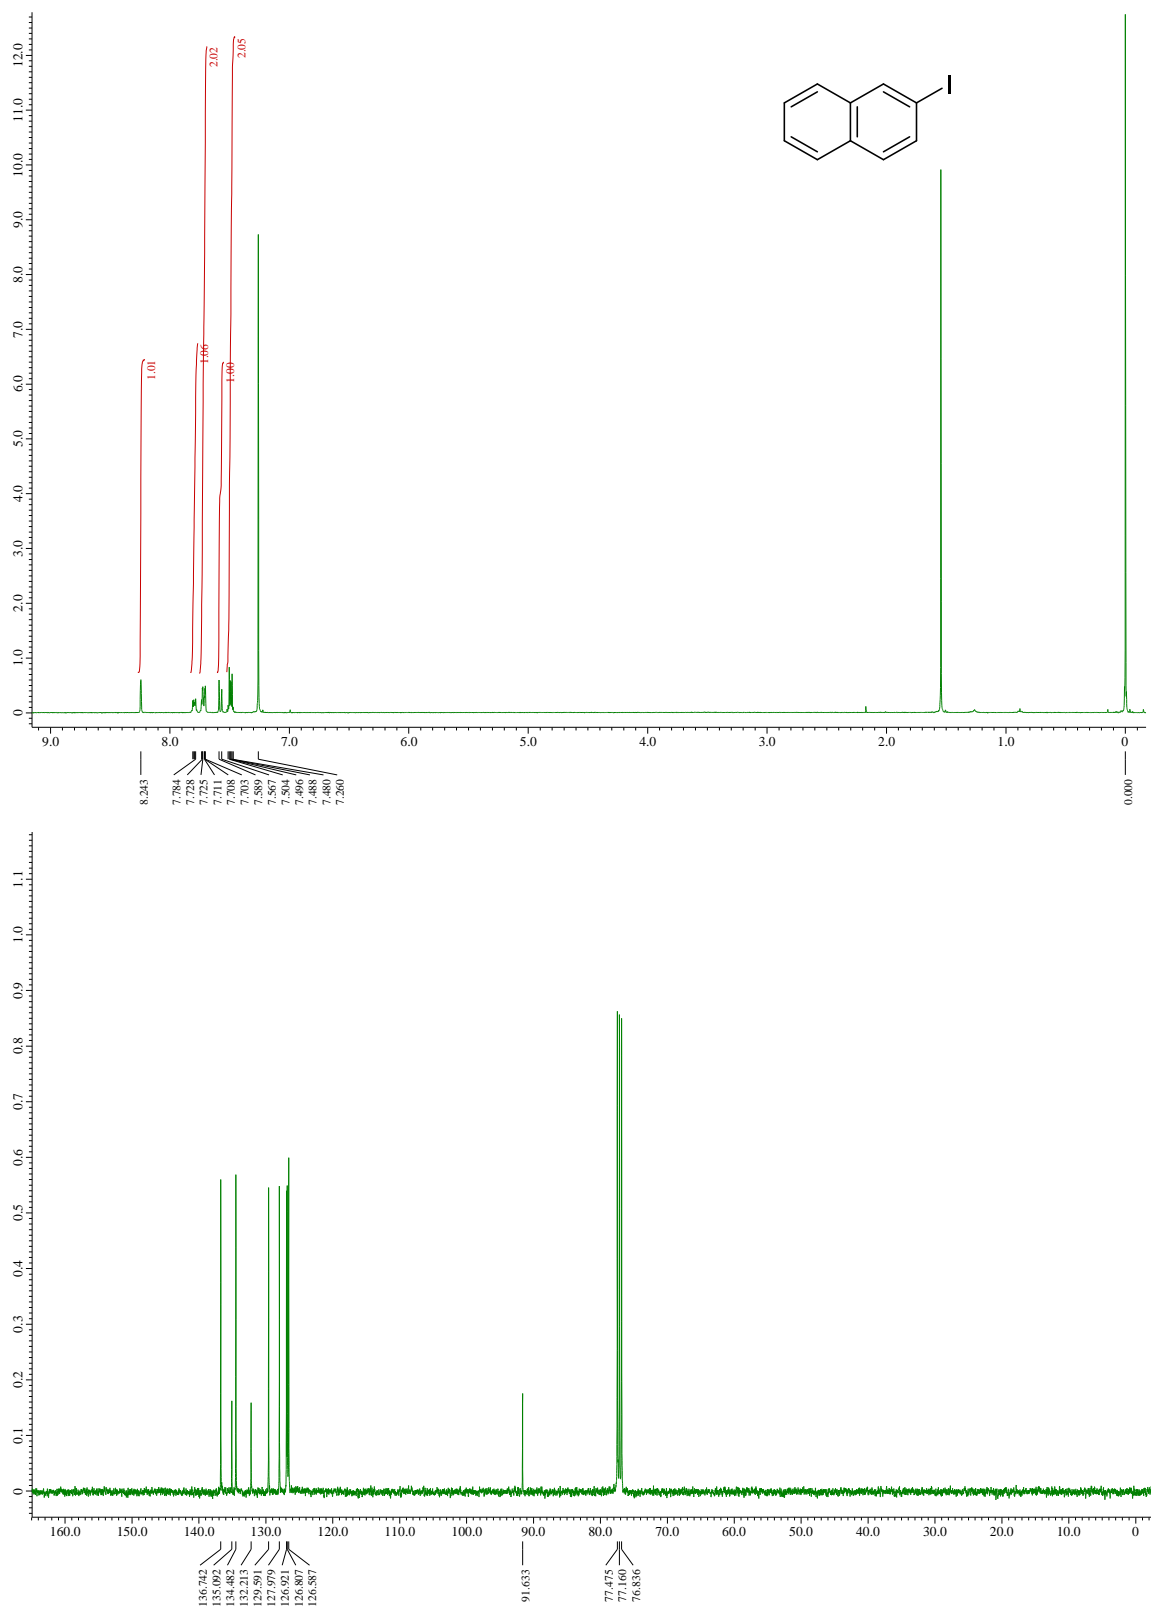

**Figure S22:**  $^1\text{H}$  and  $^{13}\text{C}\{^1\text{H}\}$  NMR Spectra of Compound **2v**

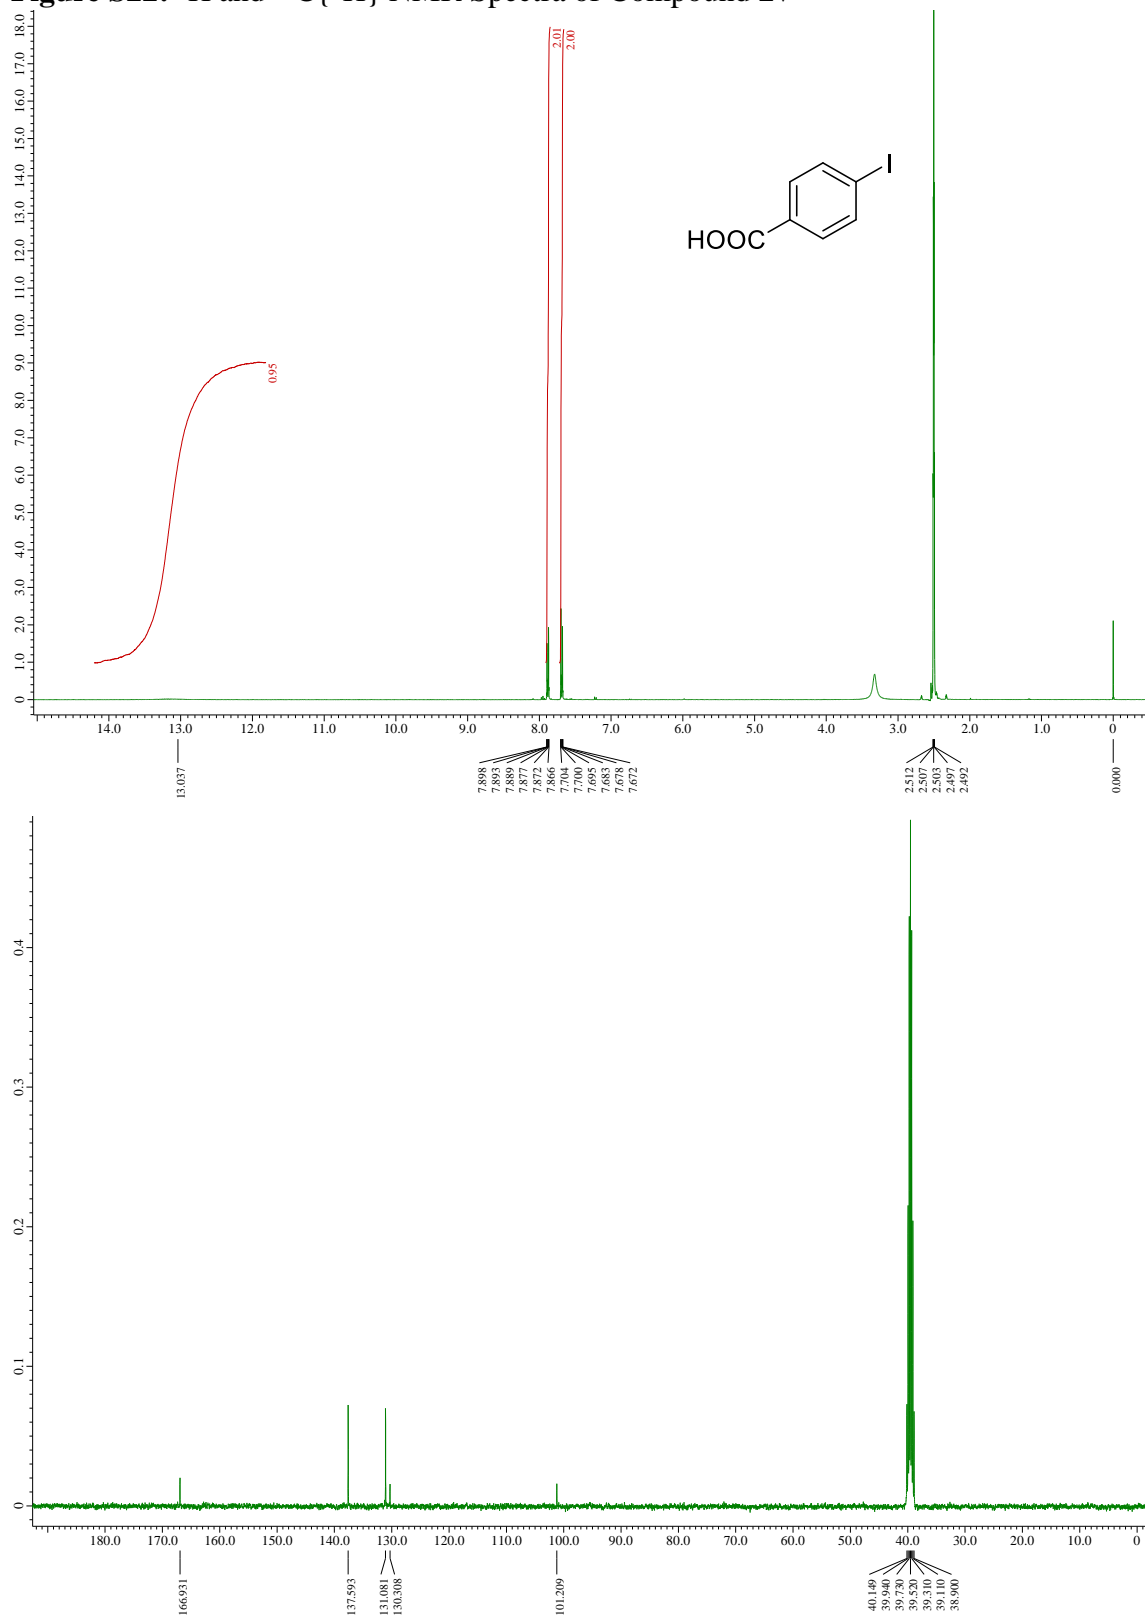



**Figure S23:**  $^1\text{H}$  and  $^{13}\text{C}\{^1\text{H}\}$  NMR Spectra of Compound **2x**

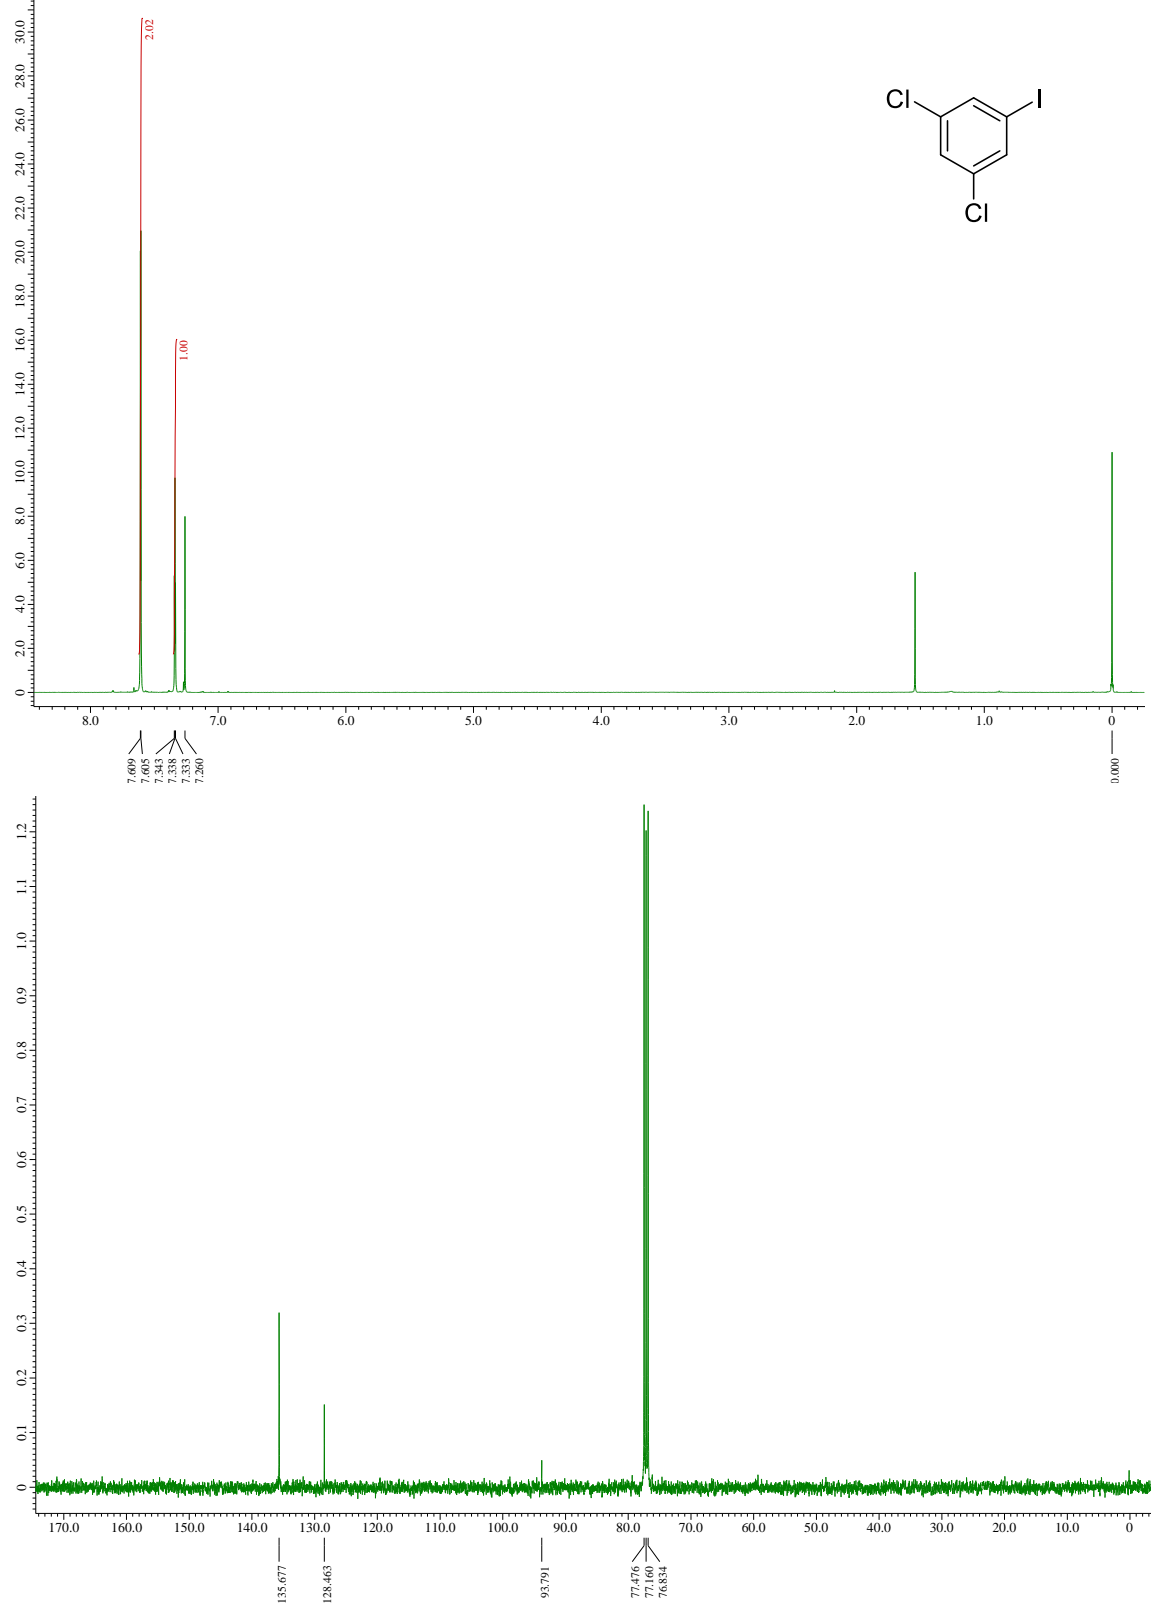

**Figure S24:**  $^1\text{H}$  and  $^{13}\text{C}\{^1\text{H}\}$  NMR Spectra of Compound **2y**

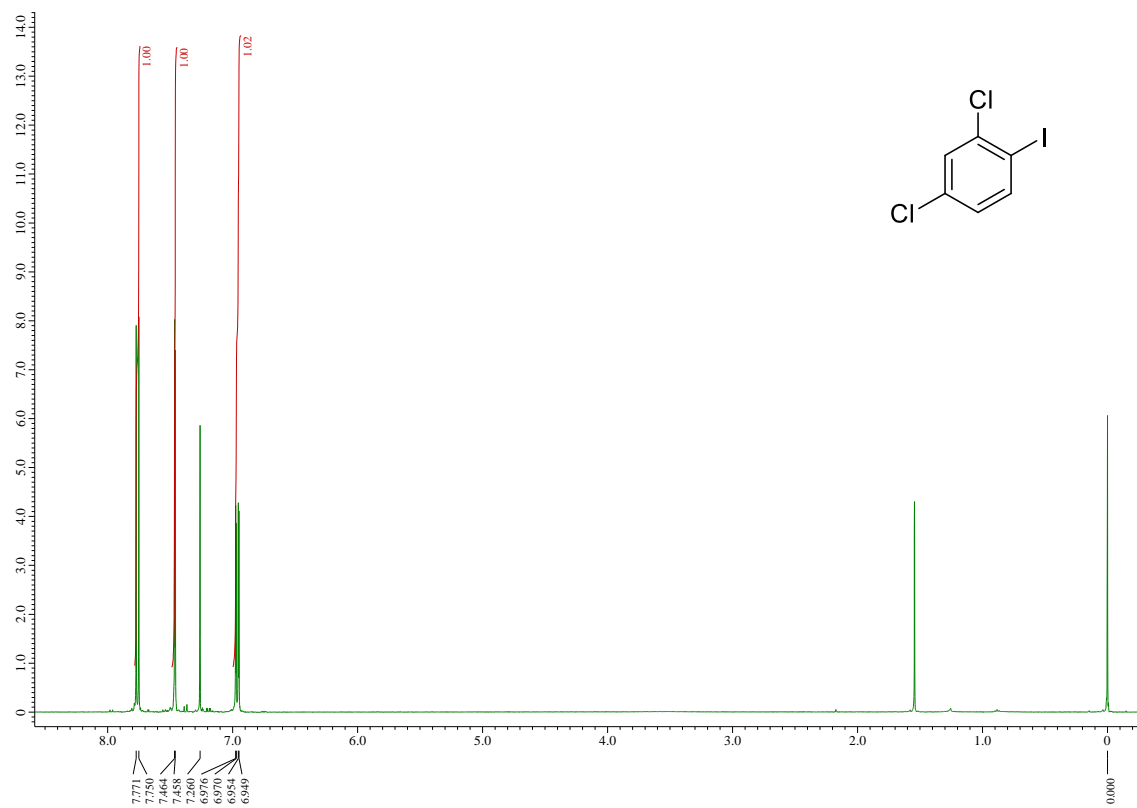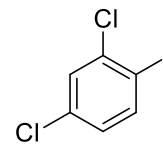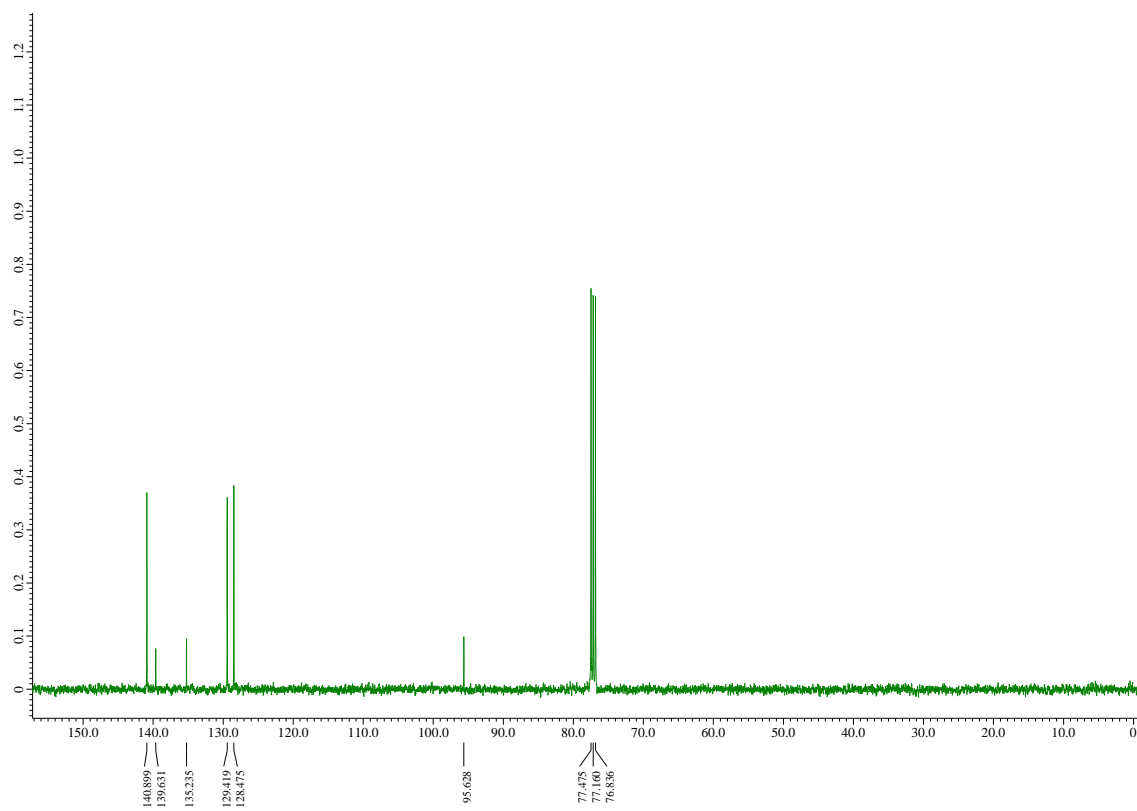

**Figure S25:**  $^1\text{H}$  and  $^{13}\text{C}\{^1\text{H}\}$  NMR Spectra of Compound **2z**

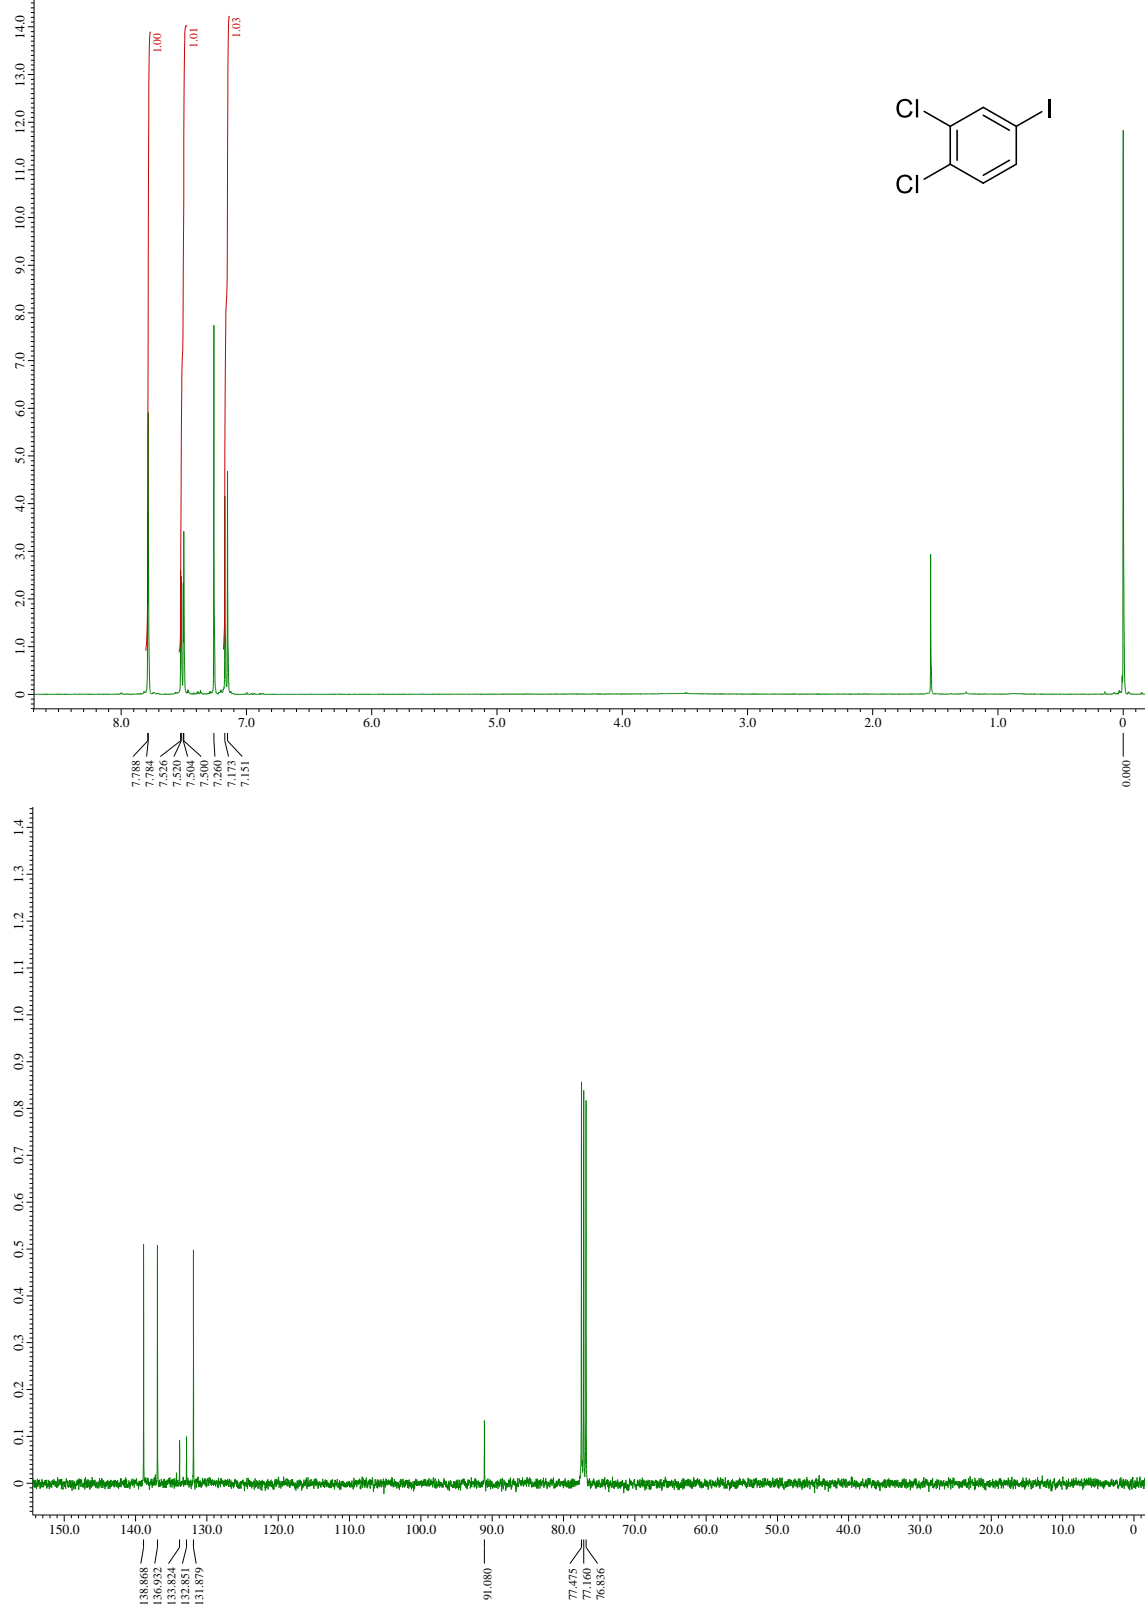

**Figure S26:**  $^1\text{H}$  and  $^{13}\text{C}\{^1\text{H}\}$  NMR Spectra of Compound **2a'**

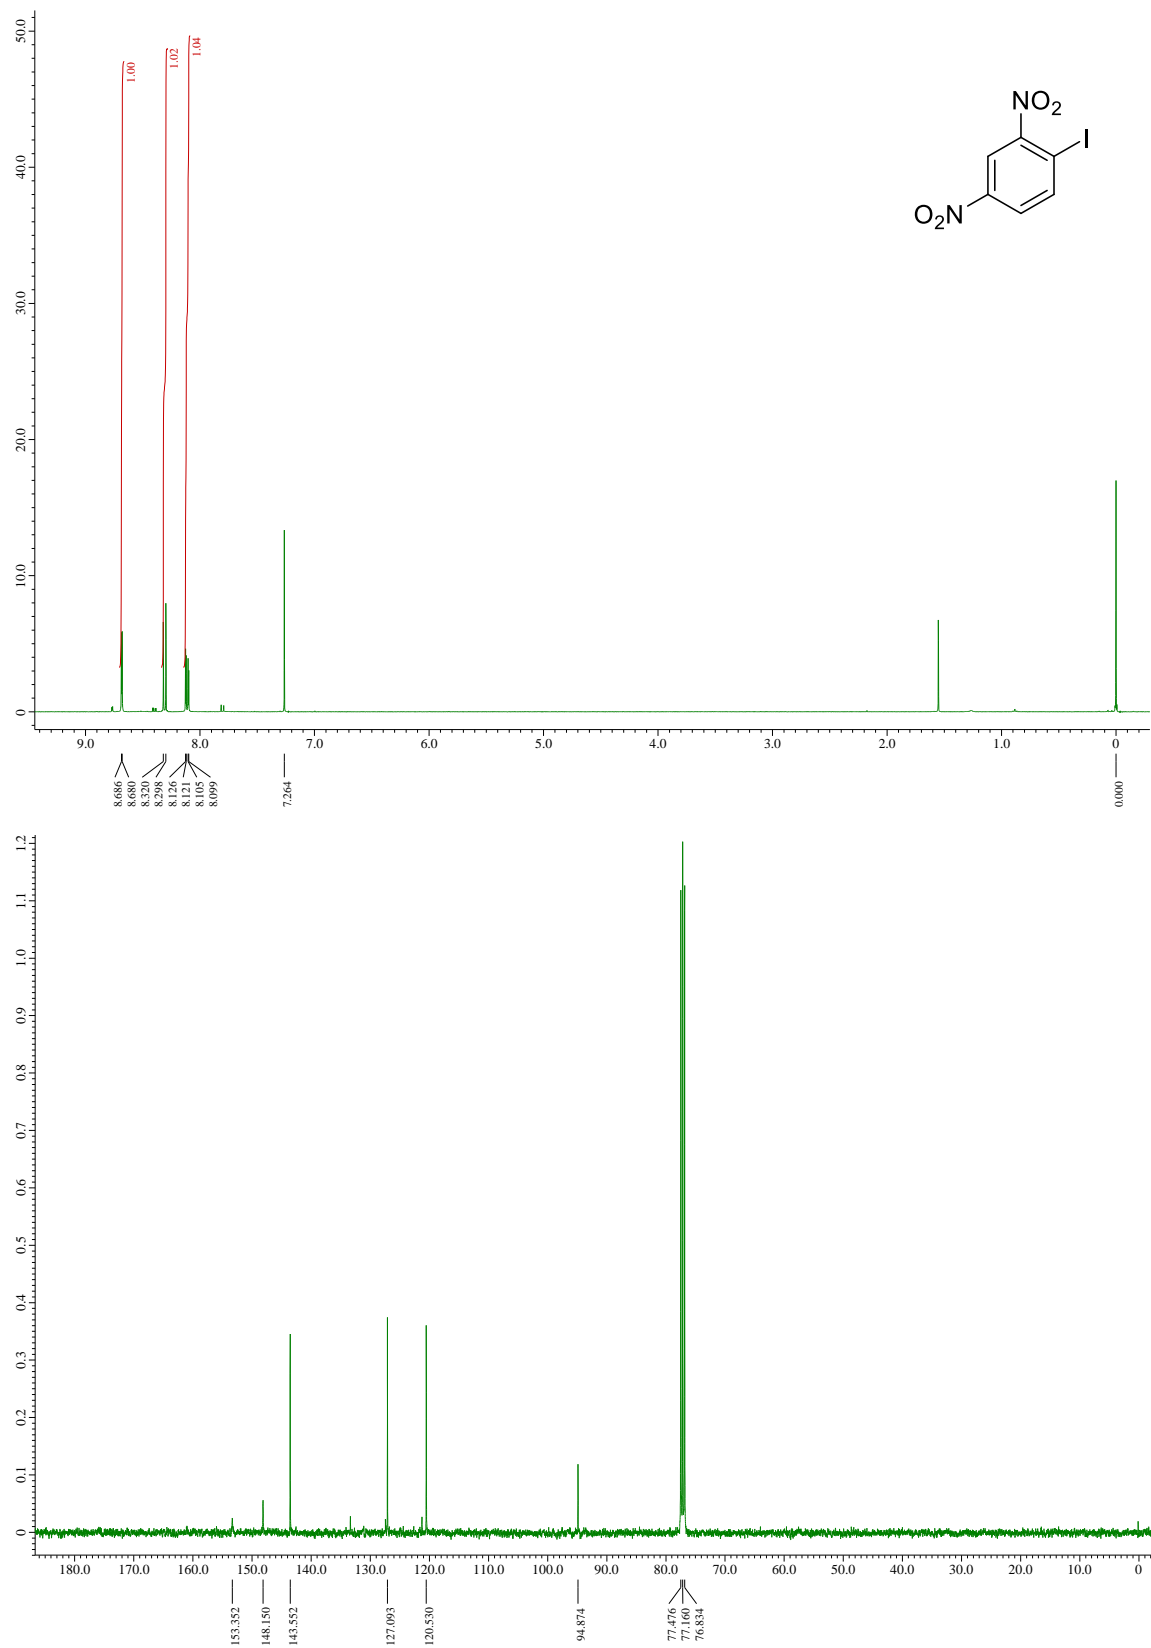

Supplement: ao8b01559_si_001.pdf [file ao8b01559_si_001.pdf]
